1 **Vaccine-induced, high magnitude HIV Env-specific antibodies with Fc-mediated effector**  
2 **functions are insufficient to protect infant rhesus macaques against oral SHIV infection**

3

4 Alan D. Curtis<sup>1</sup>, Pooja T. Saha<sup>2</sup>, Maria Dennis<sup>3</sup>, Stella J. Berendam<sup>3</sup>, S. Munir Alam<sup>3</sup>, Guido  
5 Ferrari<sup>3,4,5</sup>, Pamela A. Kozlowski<sup>6</sup>, Genevieve Fouda<sup>3</sup>, Michael Hudgens<sup>2</sup>, Koen KA Van  
6 Rompay<sup>7</sup>, Justin Pollara<sup>3,4,5</sup>, Sallie R. Permar<sup>8</sup>, and Kristina De Paris<sup>1</sup>

7

8 <sup>1</sup>Department of Microbiology and Immunology, Center for AIDS Research, and Children's  
9 Research Institute, School of Medicine, University of North Carolina at Chapel Hill, Chapel Hill,  
10 North Carolina, USA

11 <sup>2</sup>Department of Biostatistics, Gillings School of Public Health, University of North Carolina at  
12 Chapel Hill, Chapel Hill, North Carolina, USA

13 <sup>3</sup>Duke Human Vaccine Institute, Duke University Medical Center, Durham, North Carolina, USA

14 <sup>4</sup>Department of Surgery, Duke University School of Medicine, Durham, North Carolina, USA

15 <sup>5</sup>Department of Molecular Genetics and Microbiology, Duke University Medical Center, Durham,  
16 North Carolina, USA

17 <sup>6</sup>Department of Microbiology, Immunology and Parasitology, Louisiana State University Health  
18 Sciences Center, New Orleans, Louisiana, USA

19 <sup>7</sup>California National Primate Research Center, University of California at Davis, Davis,  
20 California, USA

21 <sup>8</sup>Department of Pediatrics, Weill Cornell Medical College, New York, New York, USA

22

23 Running Title: No protection by antibodies with Fc effector function

24

25 Corresponding Author

26 Kristina De Paris, PhD

27 University of North Carolina

28 Department of Microbiology, Center for AIDS Research, and Children's Research Institute

29 116 Manning Drive

30 Mary Ellen Jones Bldg., Rm 5004B

31 Chapel Hill, NC 27599-7292

32 Phone: (919) 843-9560

33 Email: [abelk@med.unc.edu](mailto:abelk@med.unc.edu)

34

35 **ABSTRACT**

36 Improved access to antiretroviral therapy and antenatal care have significantly reduced in-utero  
37 and peri-partum mother-to-child HIV transmission. However, as breastmilk transmission of HIV  
38 still occurs at an unacceptable rate there remains a need to develop an effective vaccine for the  
39 pediatric population.

40 Previously, we compared different HIV vaccine strategies, intervals, and adjuvants in infant  
41 rhesus macaques to optimize the induction of HIV envelope (Env)-specific antibodies with Fc-  
42 mediated effector function. Here, we tested the efficacy of an optimized vaccine regimen against  
43 oral SHIV acquisition in infant macaques. One group of 12 animals was immunized with 1086.c  
44 gp120 protein adjuvanted with 3M-052 in stable emulsion and Modified Vaccinia Ankara (MVA)  
45 virus vector expressing 1086.c HIV Env, while the control group (n=12) was immunized only  
46 with empty MVA. The first vaccine dose was given within 10 days of birth and booster doses  
47 were administered at weeks 6 and 12.

48 The vaccine regimen induced Env-specific plasma IgG antibodies capable of antibody-  
49 dependent cellular cytotoxicity (ADCC) and phagocytosis (ADCP). Beginning at week 15, infants  
50 were exposed orally to escalating doses of heterologous SHIV-1157(QNE)Y173H once a week  
51 until infected. Despite the induction of strong Fc-mediated antibody responses, the vaccine  
52 regimen did not reduce the risk of infection, time to acquisition, or peak viremia compared to  
53 controls. Our results suggest that the non-neutralizing Env-specific antibodies with Fc effector  
54 function elicited by this vaccine regimen were insufficient for protection against heterologous  
55 oral SHIV infection shortly after the final immunization.

56

57 **IMPORTANCE**

58 Women of childbearing age are three times more likely to contract HIV infection than their male  
59 counterparts. Poor HIV testing rates coupled with low adherence to antiretroviral therapy (ART)  
60 result in a high risk of mother-to-infant HIV transmission, especially during the breastfeeding  
61 period. A preventative vaccine could curb pediatric HIV infections, reduce potential health  
62 sequelae, and prevent the need for lifelong ART in this population. The results of the current  
63 study imply that the HIV Env-specific IgG antibodies elicited by this candidate vaccine regimen,  
64 despite high magnitude of Fc-mediated effector function, but lack of neutralizing antibodies and  
65 polyfunctional T cell responses, were insufficient to protect infant rhesus macaques against oral  
66 virus acquisition.

67

68

## 69 INTRODUCTION

70 The successful implementation of antiretroviral therapy (ART) for women living with HIV  
71 (WLWH) has resulted in a drastic reduction of in utero and peripartum mother-to-child  
72 transmission of HIV-1 in the last two decades. Yet, globally, between 400 to 500 infants  
73 continue to acquire HIV every day (1). The majority of these infections occur during the  
74 breastfeeding period. Limited access to ART in rural communities, HIV diagnosis late in  
75 pregnancy, gaps in linking antenatal care with postnatal mother and infant care, acute maternal  
76 infection during the breastfeeding period, and lack of ART adherence impede the prevention of  
77 HIV transmission by breastmilk (2-9). Transmission of HIV can occur throughout the entire  
78 breastfeeding period, with a cumulative risk increase with every month of breastfeeding (10-13).  
79 However, in many resource-limited countries, breastmilk remains a necessary choice for  
80 nutrition and to provide passive immunity to protect the infant against other endemic pathogens  
81 (6, 7, 14). Indeed, early weaning is associated with increased infant mortality (15-17), and the  
82 WHO recommends exclusive breastfeeding for 6-12 months for infants born to HIV-infected  
83 mothers (18). Infants born to mothers with known HIV-positive status are tested at birth and  
84 immediately started on ART if found to be infected, whereas infants who acquire HIV by  
85 breastfeeding often go undiagnosed until they develop clinical symptoms. Prolonged HIV  
86 replication prior to diagnosis may severely interfere with multiple aspects of normal immune and  
87 central nervous system development and impede immune reconstitution after ART initiation.  
88 Therefore, prevention strategies tailored to infants are needed to further reduce the risk of  
89 pediatric HIV infections.

90  
91 In non-human primate (NHP) models of HIV, infection of neonatal and infant rhesus macaques  
92 with SHIV can be prevented by passive administration of broadly neutralizing HIV envelope  
93 (Env)-specific antibodies (bnAbs) (19-21). The use of bnAbs as potential prevention strategy in  
94 HIV exposed infants is supported by results from ongoing clinical trials that indicate that bnAbs  
95 (e.g., VRC01) are safe and well tolerated in human neonates (22). Clinical studies in human  
96 adults, however, demonstrated only a minimal risk reduction of HIV infection by preventative  
97 treatment with bnAbs (23, 24). Therefore, the development of an effective HIV vaccine remains  
98 a high priority for this risk group. While the induction of HIV bnAbs by vaccination remains  
99 challenging, antibodies with Fc-mediated effector function can be induced more consistently and  
100 have been associated with partial protection in multiple NHP vaccine/challenge studies (25-29)  
101 and in the human RV144 HIV vaccine trial (30). Furthermore, the protective effect of bnAbs is

102 not due solely to their neutralization function, but also depends, at least in part, on the Fc-  
103 mediated effector functions of these bnAbs (31, 32).

104  
105 Utilizing the pediatric rhesus macaque model, we previously compared different HIV vaccine  
106 modalities, immunization intervals and adjuvants to optimize the induction of HIV Env-specific  
107 IgG antibodies with Fc-mediated effector functions (33-35). Building on these results, in the  
108 current study, we tested the efficacy of an intramuscular (IM) vaccine consisting of a Modified  
109 Vaccinia Ankara (MVA) virus vector expressing transmitted/founder virus 1086.c gp120-  
110 combined with 1086.c HIV gp120 protein and 3M-052 adjuvant in stable emulsion against oral  
111 SHIV acquisition in infant macaques. Consistent with our prior findings, the vaccine induced  
112 high magnitude Env-specific antibodies in plasma with potent antibody-dependent cellular  
113 cytotoxicity (ADCC) and antibody-dependent cellular phagocytic (ADCP) function. Nonetheless,  
114 these responses did not protect infant rhesus macaques against subsequent heterologous oral  
115 SHIV challenge.

116

## 117 **METHODS**

118

### 119 **Animals and sample collection**

120 Twenty-four infant rhesus macaques (RM) were nursery-reared and housed in pairs at the  
121 California National Primate Research Center (Davis, CA). All animal procedures were approved  
122 by the UC Davis Institutional Animal Care and Use Committee. The study strictly adhered to the  
123 guidelines outlined in *The Guide for the Care and Use of Laboratory Animals* by the Committee  
124 on Care and Use of Laboratory Animals of the Institute of Laboratory Resources, National  
125 Resource Council. Peripheral blood was collected by venipuncture into EDTA-treated  
126 vacutainers and processed as described (36). Peripheral lymph node biopsies were collected at  
127 week 14 prior to initiation of oral challenges at week 15 as described (33). All experimental  
128 manipulations were performed under ketamine anesthesia (10mg/kg body weight) administered  
129 by the intramuscular (IM) route.

130

### 131 **Vaccines**

132 The infants in the present study were randomly divided into 2 groups of 12 (Table 1; Figure 1).  
133 At week 0, infant RM assigned to the vaccine arm were primed IM with  $2 \times 10^8$  plaque forming  
134 units (PFU) of MVA-HIV 1086.c Env construct (in a volume of 0.25 ml divided over left and right  
135 biceps) (35) and 15  $\mu$ g 1086 $\Delta$ 7 gp120 K160N protein mixed with 3M-052 adjuvant in stable

136 emulsion (3M-052-SE) (34, 35) at a total dose volume of 0.5 ml, divided over the left and right  
137 quadriceps. The HIV Env 1086.c gp120-expressing MVA construct was produced as detailed  
138 elsewhere (37). In addition, infant vaccinees received  $5 \times 10^{10}$  viral particles (VP) of chimpanzee  
139 adenovirus (ChAdOx1.tSIVconsv239)-SIV Gag/Pol (0.25 ml IM divided over left and right  
140 gluteus) at week 0. Infants in the vaccine cohort received two successive IM booster  
141 immunizations with 1086.c gp120 protein in 3M-052-SE and MVA-HIV Env (both were the same  
142 dose as the priming immunization) and  $2 \times 10^8$  PFU MVA.tSIVconsv239 (gag/pol-expressing  
143 vector) in 0.25 ml, divided over left and right biceps) at weeks 6 and 12 (35). The  
144 ChAdOx1.tSIVconsv239 and MVA.tSIVconsv239 were kindly provided by Dr. Tomáš Hanke  
145 (Oxford University, Oxford, UK). Control infants received an empty MVA vector at weeks 0, 6,  
146 and 12 (Figure 1).

147

#### 148 **SHIV-1157(QNE)Y173H challenge of vaccinated and control macaques**

149 At week 15, 3 weeks after the last immunization, infant macaques were orally exposed once  
150 weekly to Tier 2 SHIV-1157(QNE)Y173H, a derivative of the CCR5-tropic clade C SHIV-  
151 1157ipd3N4 (28), that was kindly provided by Dr. Sampa Santra (Harvard University, Boston,  
152 MA). The virus stock corresponded to  $3.7 \times 10^9$  copies/ ml and had a TCID<sub>50</sub> of  $4.88 \times 10^8$ /ml in  
153 TZM-bl cells (28, 38). SHIV-1157(QNE)Y173H (henceforth referred to as SHIV) was selected for  
154 its high sequence homology to the 1086.c V1V2 region (28). Virus was administered as a  
155 1:1000 dilution of virus stock in 1 ml sucrose-containing RPMI 1640 medium in a needleless  
156 syringe (39). Infants were considered to be systemically infected following two consecutive  
157 PCR-positive values (see below). After 13 challenges of 1:1000, uninfected infants (n=11)  
158 received an increased dose of 1:100. Following 7 challenges with 1:100 diluted virus, the viral  
159 challenge was increased to 1:10 dilution in the remaining uninfected animals (n=4). Two infants  
160 (RM19 and RM10) remained negative and became infected after challenge with 1:2 dilution of  
161 virus stock or undiluted virus, respectively (Table 1). Approximately 12 weeks post SHIV  
162 infection, animals were euthanized.

163

#### 164 **SHIV RNA quantification**

165 Weekly quantitative analysis of SHIV RNA in plasma began on week 16 as previously described  
166 (36). Briefly, RNA was manually extracted from limited plasma volumes and assayed by reverse  
167 transcription-PCR (RT-PCR) with a limit of detection of 15 copies/ ml. Data are reported as the  
168 number of SHIV RNA copy equivalents per ml of EDTA plasma.

169

## 170 **Measurement of plasma HIV Env-specific IgG by ELISA**

171 HIV Env-specific antibody concentrations in plasma were determined by ELISA (33). Microtiter  
172 plates were coated with 1086Δ7 gp120K160N (3 µg/ml) overnight at 4°C and blocked with PBS  
173 + 4% whey, 15% normal goat serum, and 0.5% Tween 20. Serially diluted plasma was added to  
174 the plate following extensive washing. IgG antibodies were detected with peroxidase-labeled  
175 anti-monkey IgG (Southern Biotech), followed by tetramethylbenzidine (TMB; KPL) and stop  
176 solution. Absorbance was read at 450 nm immediately after addition of the stop solution. The  
177 simianized CD4 binding site monoclonal antibody B12R1 was used as a standard (40). The  
178 concentration of HIV Env-specific IgG was calculated using a five-parameter fit curve relative to  
179 the standard using SoftMax Pro 6.3 software (Molecular Devices). To account for non-specific  
180 binding, the positivity cutoff was selected as the concentration corresponding to 3 times the OD  
181 of blank wells.

182

## 183 **Measurement of Env-specific antibodies by binding antibody multiplex assay (BAMA)**

184 Salivary IgG and IgA and plasma IgA antibodies to gp120 were measured using a customized  
185 multiplex assay with 1086.cΔ7 gp120-conjugated fluorescent magnetic beads as previously  
186 described (33). Prior to performing IgA assays, specimens were depleted of IgG using Protein G  
187 Sepharose (GE Healthcare) as described (41). Concentrations of gp120-specific antibodies in  
188 saliva were normalized relative to the total IgA or IgG concentrations, which were measured by  
189 ELISA. Results for saliva are presented as specific activity (ng anti-gp120 IgA or IgG antibody  
190 per µg total IgA or IgG, respectively).

191

## 192 **Antibody avidity**

193 The avidity of IgG antibodies to 1086.cΔ7 gp120, 1086.C V1V2, gp70 consensus C V3 (33),  
194 1157ipd3N4 gp120, and 1157(QNE)Y173H V1V2 was determined using purified total plasma  
195 IgG and surface plasmon resonance (SPR) using a Biacore 4000 instrument as described  
196 previously (33). The relative avidity score equals the binding response divided by the  
197 dissociation rate constant.

198

## 199 **Antibody-dependent cellular cytotoxicity (ADCC)**

200 ADCC activity was measured as previously reported (42). Briefly, CCR5<sup>+</sup> CEM.NK<sup>R</sup> T cells  
201 (AIDS Reagent Program) were coated with 1086.c or SHIV-1157ipd3N4 gp120 protein. ADCC  
202 activity was determined by the GranToxiLux (GTL) assay as described (33, 42, 43). Four-fold  
203 serial plasma dilutions beginning at 1:100 were incubated with target cells and human PBMCs

204 from a cryopreserved leukapheresis of an HIV-seronegative donor with the 158F/V genotype for  
205 FcγRIIIa after thawing and overnight rest (43-45). ADCC function is reported as endpoint titers  
206 determined by interpolation of plasma dilutions that intercepted the positive cutoff and as the  
207 maximum proportion of target cells positive for active granzyme B (maximum activity).

208

### 209 **Infected cells antibody binding assay (ICABA)**

210 Plasma antibody binding to HIV-1 Env expressed on surface of infected cells was measured  
211 using an infected cell binding assay as previously described (28, 46). Briefly, CEM.NKR<sub>CCR5</sub>  
212 cells were mock-infected or infected with a replication competent infectious molecular clone  
213 virus encoding the 1086.c Env (47) for 48-72 hours. Cells were then cultured in the presence of  
214 diluted plasma samples from study infants. Cells were subsequently stained with a viability  
215 marker, anti-CD4 antibody (clone OKT4, eBiosciences), fixed, and permeabilized prior to  
216 staining with a FITC-conjugated goat anti-rhesus IgG (H+L) polyclonal antibody (Southern  
217 Biotech). Data represent the frequency of cells positive for IgG-binding to Env for post-  
218 vaccination samples compared to the pre-vaccination sample. Values were normalized by  
219 subtraction of the frequency of positive cells observed for cells stained with secondary antibody  
220 alone and mock-infected cells.

221

### 222 **Antibody-dependent cellular phagocytosis (ADCP)**

223 ADCP assay was performed as previously described (48, 49). HIV envelope (Env) 1086.c  
224 K160N gp120 protein was produced in-house by transfection of 293T cells. For ADCP, the HIV  
225 Env 1086.c K160N gp120 protein was conjugated to biotin using the Fast Type A Biotin  
226 Conjugation kit (Abcam) and then captured on avidin-labeled fluorescent beads (NeutrAvidin<sup>TM</sup>,  
227 Invitrogen). To form immune complexes with Env-expressing beads, plasma (1:50 dilution),  
228 positive antibody controls (HIVIG, RIVIG, VRC01), or irrelevant antibody control (influenza-  
229 specific monoclonal antibody, CH65) were incubated with antigen-conjugated beads at 37 °C for  
230 2 hours. All monoclonal antibody controls were used at a concentration of 25 µg/ml. Immune  
231 complexes were then subjected to spinoculation at 1,200 x g in presence of a human-derived  
232 monocyte cell line, THP-1 cells (ATCC TIB-201) for 1 hour at 4°C. Following spinoculation,  
233 bead-conjugated antigens and cells were incubated at 37 °C to allow for phagocytosis to occur.  
234 After 1 hour incubation, THP-1 cells were fixed with 2% paraformaldehyde (Sigma) and  
235 fluorescence of the cells was assessed by flow cytometry (BD, Fortessa). A “no antibody”  
236 control consisting of PBS supplemented with 0.1% bovine serum albumin (1X PBS+0.1% BSA)  
237 was used to determine the background phagocytosis activity. Phagocytosis scores were

238 calculated by multiplying the mean fluorescence intensity (MFI) and frequency of bead-positive  
239 cells and dividing by the MFI and frequency of bead-positive cells in the PBS/BSA control. All  
240 plasma samples were tested in two independent assays and the average phagocytic scores  
241 from these 2 independent assays was reported.

242

### 243 **Neutralizing antibody characterization**

244 Neutralizing antibodies were tested as previously reported (50). Briefly, serum was heat-  
245 inactivated for 1 hour at 56°C and diluted in cell culture medium and pre-incubated with HIV-1  
246 pseudotyped virus (51) for 1 hour. Following pre-incubation, TZM-bl cells were added and  
247 incubated for 48 hours. Cells were subsequently lysed and luciferase activity was determined  
248 using a luminometer and BriteLite Plus reagent (PerkinElmer). Neutralization titers were defined  
249 as the serum dilution which reduced relative light units by 50% relative to control wells after  
250 background subtraction.

251

### 252 **Flow Cytometric Analysis**

253 *T cell activation:* PBMC were isolated from blood as previously described (36).  $10^6$  PBMC were  
254 stained with surface antibodies listed in Table 2 at room temperature for 20 minutes in the dark.  
255 Cells were treated with Cytofix/ Cytoperm (BD Biosciences) per the manufacturer's protocol and  
256 subsequently stained with intracellular marker antibodies (Table 2) in the same manner. Stained  
257 cells were fixed with 1% paraformaldehyde (Electron Microscopy Services). 300,000 events  
258 were collected using a BD LSRFortessa and analyzed using FlowJo v10.6.1.

259 *SIV Gag-specific T cell responses:* SIV Gag-specific T cell responses were determined as  
260 described previously (52). Briefly,  $2 \times 10^6$  cells were cultured in RPM 1640 supplemented with  
261 glutamine, 10% heat-inactivated FBS, and Penicillin/Streptomycin and stimulated with i) vehicle  
262 DMSO, ii) 0.5X Cell Stimulation Cocktail (eBiosciences), or iii) 5 $\mu$ g SIV p27Gag peptide pool  
263 (NIH AIDS Reagent Program) for 6 h, with 1X Brefeldin A present after the first hour. Cells were  
264 stained with antibodies (Table 2) and analyzed as above.

265

### 266 **Statistical Analyses**

267 Statistical tests were performed using R version 3.6.2.

#### 268 *Probability of Infection*

269 Kaplan-Meier curves and log-rank tests with exact p-values were used to assess differences  
270 between the two groups in the probability of infection at any challenge dose. We presented  
271 curves and tested for differences in the probability of infection at any dose. One animal missed



272 seven weekly challenges before resuming challenges on the 1:100 dose and becoming infected  
273 on their first 1:100 dose challenge. Thus, the animal was treated as censored at their seventh  
274 challenge, (a 1:1000 dose). We estimated the per-challenge probability of infection at each dose  
275 administered (1:1000, 1:100, 1:10, 1:2, 1:1) as [# animals infected by a challenge at this dose] /  
276 [total number of challenges (across and within all animals) administered up to and including the  
277 week of infection at this dose]. For each per-challenge probability of infection, we constructed  
278 an approximate 95% confidence interval (Wilson score interval without continuity correction) by  
279 assuming that all challenges across and within animals are independent.

280

### 281 *Antibody correlates of protection*

282 We assessed the association of Env-specific plasma IgG, salivary IgG, salivary IgA, antibody  
283 avidity, ADCC, infected cell binding, and ADCP at week 15 with the number of challenges  
284 required to achieve SHIV infection in vaccinated animals only. Spearman's rank correlation  
285 coefficients were estimated to assess these associations. All correlations were tested with exact  
286 p-values to assess whether any were significantly different from 0. To adjust for multiple  
287 comparisons, the Benjamini-Hochberg (BH) procedure was used to control the false discovery  
288 rate (FDR). An adjustment to control the FDR at a value of 0.05 was performed for these pre-  
289 specified endpoints for a total 16 parameters (Table 3).

290

### 291 *Cellular correlates of protection*

292 Wilcoxon rank-sum tests with exact p-values were used to compare the CCR5<sup>+</sup> (CD195<sup>+</sup>), Ki-  
293 67<sup>+</sup>, CD69<sup>+</sup>, and CD279<sup>+</sup> (PD1) CD4<sup>+</sup> T cells at week 15 between vaccinated and control  
294 animals. An adjustment to control the FDR at an  $\alpha$  value of 0.05 was performed for these 5  
295 endpoints using the BH procedure.

296

297 Spearman's rank correlation coefficients were estimated for the cohort as a whole as well as for  
298 vaccinated animals only. All correlations were tested with exact p-values to assess whether any  
299 were significantly different from 0. The entire cohort was used to assess whether there was an  
300 association between CD4<sup>+</sup> T cell activation parameters at week 15 and the number of  
301 challenges required for SHIV infection. Vaccinated animals were used to assess whether there  
302 appeared to be an association between Env-specific B cells and the number of challenges  
303 required for SHIV infection. To adjust for multiple comparisons, the Benjamini-Hochberg (BH)  
304 procedure was used to control the false discovery rate (FDR). An adjustment to control the FDR

305 at an  $\alpha$  value of 0.05 was performed for these pre-specified correlation endpoints for a total 6  
306 parameters (Table 3).

307

## 308 **RESULTS**

### 309 *Study design*

310 The current study utilized infant RM that were randomly divided into 2 groups of 12 at birth  
311 (Table 1; Figure 1). Infant RM in the vaccine group were immunized at week 0 with  $2 \times 10^8$  PFU  
312 of MVA-HIV 1086.c Env construct and 15  $\mu$ g 1086.c gp120 protein mixed with 3M-052-SE  
313 adjuvant by the IM route. To induce T cell responses, infant vaccinees were also primed with  
314  $5 \times 10^{10}$  vp of ChAdOx1.tSIVconsv239 at week 0. At weeks 6 and 12, infants in the vaccine  
315 cohort received IM booster immunizations with MVA-HIV Env, 1086.c gp120 protein in 3M-052-  
316 SE, and  $2 \times 10^8$  PFU MVA.tSIVconsv239. Control infants received an empty MVA vector at  
317 weeks 0, 6, and 12 (Figure 1). Once weekly oral SHIV challenges were initiated at week 15, 3  
318 weeks after the last immunization. Animals were followed for approximately 12 weeks post  
319 SHIV-infection, with infection being defined as an animal having two consecutive positive viral  
320 RNA results.

321

### 322 *Vaccine-induced 1086.c envelope-specific antibody responses*

323 We first aimed to confirm our prior findings that the vaccine regimen induces potent HIV Env-  
324 specific antibody responses (35). Plasma 1086.c gp120-specific IgG responses were detected  
325 as early as week 3 after the first immunization in the majority of animals (Figure 2A). Antibody  
326 levels were enhanced following the week 6 booster immunization, waned slightly thereafter, and  
327 reached peak levels after the final immunization at week 12. Geometric mean plasma HIV Env-  
328 specific IgG concentrations at week 14 (1,060,401 ng/ml; 95% CI [1,470,184; 21020]) were  
329 comparable to those elicited in our prior study (1,251,467 ng/ml; 95% CI [1,049,651; 53481])  
330 (35). We also tested for the induction of Env-specific plasma IgA antibody in vaccinated infants  
331 (Figure 2B). The induction of plasma Env-specific plasma IgA was delayed compared to plasma  
332 IgG and was of lower magnitude. Env-specific IgG and IgA were also detectable in saliva  
333 (Figures 2C, D). The positive correlation between plasma and salivary Env-specific IgG and IgA  
334 (Figures 2E, F) implied that antibodies in saliva likely reflected transudation from the plasma  
335 rather than local induction at mucosal sites.

336

337 We next evaluated the avidity and functional potential of Env-specific plasma IgG. The avidity of  
338 plasma IgG specific for 1086.c gp120 was measured by SPR and the median avidity score at

339 week 14 was determined to be  $2.4 \times 10^7$  (95% CI [ $1.45 \times 10^7$ ,  $6.5 \times 10^7$ ]) (Figure 3A), an avidity  
340 similar ( $p=0.4$ ; Wilcoxon rank-sum test) to the one in our previous study (median avidity score:  
341  $4.6 \times 10^7$ ; 95% CI [ $1.2 \times 10^7$  to  $9.6 \times 10^7$ ]) (35). The avidity of plasma vaccine-elicited IgG was  
342 stronger for the clade C consensus V3 compared to the V1V2 epitope of 1086.c Env (Figure  
343 3A). The current vaccine regimen elicited weak clade C Tier 1 neutralization antibodies. In 7 of  
344 12 vaccinated infants, the peak neutralization titers against the Tier 1b virus I6644.v2.c33 were  
345  $>500$  at week 14, but only 5 of the 7 animals had maintained Tier 1b ID<sub>50</sub> titers  $>500$  by week 15  
346 (Figure 3B).

347  
348 Because a main goal of the current design was to elicit non-neutralizing antibody, we assessed  
349 the propensity of vaccine-elicited plasma antibody for FcR-mediated ADCC. ADCC responses  
350 against Env 1086.c gp120 were detectable in 75% of vaccinated infants by week 9 and in 100%  
351 by the time of initial SHIV challenge at week 15 (Figure 3C). Similar to vaccine-induced plasma  
352 Env-specific IgG, the high ADCC endpoint titers and median granzyme B activity (Figure 3D) in  
353 the current study were comparable to those observed in our prior study (35). In addition to  
354 ADCC, 1086.c Env-specific plasma antibodies were also able to mediate ADCP (Figure 3E).  
355 Relevant to both ADCC and ADCP function, plasma IgG was capable of binding to Env 1086.c  
356 expressed on the surface of HIV-infected cells (ICABA), with 11 of 12 infants having  $>20\%$   
357 binding at week 15 (range: 7.60%-62.62%; mean: 44.70%) (Figure 3F).

358  
359 We also measured antibody responses relevant to the heterologous SHIV challenge virus,  
360 including clade C 1157ipd3N4 Env-specific IgG and 1157(QNE)Y173H Env V1V2-specific  
361 antibody responses. Although the overall magnitude of plasma binding antibodies to  
362 1157ipd3N4 gp120 was lower compared to 1086.c gp120-specific IgG, the kinetics of plasma  
363 binding antibodies to 1157ipd3N4 Env followed a similar pattern as observed for 1086.c gp120-  
364 specific IgG. All animals developed 1157ipd3N4 gp120-specific IgG after the second  
365 immunization with peak responses at week 14, two weeks after the third immunization (Figure  
366 4A). The median avidity score of plasma IgG against 1157id3N4 gp120 ( $1.9 \times 10^6$ ; 95% CI [ $7.3$   
367  $\times 10^6$ ,  $2.3 \times 10^6$ ]) was about 1 log lower compared to the avidity index for the vaccine immunogen  
368 1086.c gp120, and the avidity for the V1V2 region of 1157(QNE)Y173H was one log lower  
369 compared to the avidity for 1086.c V1V2 (Figures 4B and 3A). The vaccine regimen elicited high  
370 levels of Env-specific plasma antibodies with ADCC activity against the clade C 1157ipd3N4  
371 gp120 (Figure 4C), with median endpoint titers ( $2.89 \times 10^5$ ) comparable to the median titer for

372 1086.c ( $2.99 \times 10^5$ ; Figure 3B), although ADCC 1157ipd3N4-specific IgG endpoint titers exhibited  
373 greater variability among the individual animals.

374

#### 375 *Cellular responses to vaccination*

376 The majority of vaccinated animals developed SIV Gag-specific T cell responses by week 14 in  
377 peripheral blood (Figure 5A). In lymph nodes, however, SIV Gag-specific T cell responses were  
378 only detected in 9 of 12 vaccinees (Figure 5B). SIV Gag-specific CD4<sup>+</sup> T cells appeared to  
379 produce predominantly TNF- $\alpha$  and IL-17, whereas a more mixed cytokine response was  
380 observed in CD8<sup>+</sup> T cells. Polyfunctional cytokine responses were rare.

381

#### 382 *SHIV1157(QNE)Y173H challenge outcome*

383 Starting at week 15, 3 weeks after the third immunization, animals were challenged once weekly  
384 with SHIV by the oral route. The initial virus dose consisted of 1:1,000 diluted virus stock, a  
385 dose that was purposely chosen to be 10-fold higher compared to the dose (1:10,000)  
386 successfully used in an intrarectal challenge study in adult rhesus macaques (28), because of  
387 the lower risk estimate for oral versus IR infection determined by human HIV epidemiologic  
388 studies (53) and SHIV1157 infections in adult RM (54). Seven of 12 control vaccinated infants  
389 became infected at the 1:1000 SHIV dose and 4 of the remaining 5 animals became infected at  
390 1:100. RM10 remained uninfected after 29 challenges and only became infected after oral  
391 challenge with undiluted viral stock (Figure 6A, Table 1). The median challenge number  
392 required to become infected for control vaccinated infants was 7.5. In comparison, vaccinated  
393 animals required a median number of 11 challenges to achieve infection (Figure 6B). Half of the  
394 vaccinated animals (n=6) were infected at the 1:1000 dose and three additional animals by the  
395 1:100 dose. The remaining 3 animals were infected by 1:10 (n=2) and 1:2 (n=1) challenge virus  
396 dilutions (Figure 6A). Although vaccinated animals required a slightly higher average number of  
397 challenges to infection (11 exposures) compared to controls (7.5 exposures), there was no  
398 difference in the probability of infection at any challenge dose between the two groups (p=0.89;  
399 Figure 6C). When we compared the probability of infection between control and vaccinated  
400 animals that became infected at the 1:1,000 challenge virus dose, at the 1:1000 or 1:100 dose,  
401 or at the 1:1000, 1:100, or 1:10 doses, we also did not detect differences in infection risks. The  
402 distribution of peak viremia also did not differ between vaccinated animals (median:  $1.85 \times 10^7$   
403 viral RNA copies/ ml) and control animals (median:  $7.5 \times 10^6$  viral RNA copies/ ml; Wilcoxon rank-  
404 sum test with exact p=0.24) (Figure 6D).

405

406 These data implied that the vaccine-induced Fc-mediated effector functions of Env-specific  
407 plasma IgG were insufficient to protect against oral SHIV challenge in infant macaques. In fact,  
408 vaccine virus-specific ADCC activity was associated with fewer challenges required for infection  
409 ( $r = -0.761$ , unadjusted  $p = 0.0054$ ; FDR adjusted  $p = 0.0870$ ; Table 3; Figure 7A). This trend was  
410 most apparent when vaccinated infant RM were stratified by median ADCC titer ( $2.99 \times 10^5$ ). The  
411 results suggested that animals with ADCC titers below the median required more SHIV  
412 exposures to become infected compared to animals with ADCC titers above the median (Figure  
413 7B). However, the probability to infection was not different between control animals, vaccinated  
414 animals with ADCC titers below the median, and vaccinated animals with ADCC titers above the  
415 median (log rank test with exact  $p = 0.06$ ). Consistent with comparable median ADCC titers for  
416 1086.c and 1157ipd3N4 Env, 1157ipd3N4 Env-specific ADCC titers trended towards a negative  
417 correlation with the number of challenges required for infection, although this trend was not  
418 substantiated after adjusting for FDR (Table 3;  $r = -0.568$ , unadjusted  $p = 0.0580$ ; FDR adjusted  
419 for  $p = 0.4043$ ). There was no association between ADCC activity, as assessed by maximum  
420 granzyme B production, and challenge outcome. Similarly, neither plasma or salivary Env-  
421 specific binding antibodies at week 15, nor the avidity of Env-specific antibodies correlated with  
422 challenge outcome (Table 3).

423  
424 To explore whether the vaccine had caused non-specific immune activation that could promote  
425 increased susceptibility to infection (55, 56), we tested for activation of peripheral blood CD4<sup>+</sup> T  
426 cells, the main target cells for HIV. At the time of challenge initiation (week 15) we noted no  
427 difference in the frequency distributions of CCR5<sup>+</sup> (CD195<sup>+</sup>), Ki-67<sup>+</sup>, CD69<sup>+</sup>, or CD279<sup>+</sup> (PD1)  
428 CD4<sup>+</sup> T cells in blood of vaccinated compared to control animals (Figure 8). Although vaccinated  
429 animals had greater median frequencies of PD-1-positive and TNF- $\alpha$ -producing CD4<sup>+</sup> T cells  
430 compared to the control group (Figure 8), there was no correlation with this response and the  
431 number of exposures required to achieve infection (Table 3).

## 432 433 **DISCUSSION**

434  
435 According to the UNAIDS 2021 estimates, in 2020, every day more than 400 children became  
436 infected with HIV (1). Therefore, despite increasing access to ART, vaccine development  
437 remains an urgent task to prevent new pediatric HIV infections. The current study tested the  
438 efficacy of an MVA-Env plus Env protein with 3M-052-SE adjuvant vaccine regimen combined  
439 with an ChAdOx.1.tconsSIVma239-Gag, Pol prime, MVA.tconsSIVma239-Gag, Pol boost

440 regimen that had been optimized to maximize Env-specific antibody responses with Fc-  
441 mediated effector function (33-35, 42) in infant RM. Several previous HIV vaccine studies in  
442 NHP had found a correlation between reduced infection or control of viral replication and  
443 vaccine-induced antibodies mediating ADCC (28, 57-59) and/or ADCP and antibody-dependent  
444 neutrophil phagocytosis (25-27). However, despite the induction of robust Env-specific  
445 antibodies with Fc-mediated effector functions, infant RM receiving the above described vaccine  
446 regimen were not protected against oral SHIV infection. There was also no evidence of virus  
447 control, a clinically important secondary read-out of vaccine efficacy pertaining to less severe  
448 disease outcomes and reduced HIV transmission risk (60).

449  
450 The reasons for lack of efficacy are likely multifold. We used a challenge virus with an Env that  
451 was heterologous to the vaccine immunogen and started challenges shortly (3 weeks) after the  
452 last vaccine immunization to closely mimic consistent, real-world exposure of infants breastfed  
453 by HIV-infected women. It is possible that some residual activation in response to immunization  
454 was still lingering. We (55, 56) and others (61-64) had previously reported that T cell activation  
455 can contribute to an enhanced risk of infection with HIV, SIV or SHIV. Although we observed  
456 higher frequencies of TNF- $\alpha$ -positive peripheral blood CD4<sup>+</sup> T cells at the time of the first  
457 challenge in vaccinated compared to control animals, T cell activation was not correlated with  
458 the number of SHIV challenges required for infection.

459  
460 In our studies leading up to the current vaccine study (33-35, 42, 56), we had focused on the  
461 optimization of Fc-mediated Env-specific IgG responses. Our vaccine regimen was not  
462 designed to induce Tier 2 neutralizing antibodies that are thought to be essential in the  
463 protection against SHIV infection in RM (65). We had further reasoned that the inclusion of  
464 ChAd- and MVA-vectored vaccines expressing SIV Gag, Pol would induce antiviral T cell  
465 responses capable of controlling virus replication at the entry site. However, SIV Gag-specific T  
466 cell responses elicited by the ChAd- and MVA-vectored vaccines were of relatively low  
467 magnitude and neither PBMC nor lymph node CD4<sup>+</sup> and CD8<sup>+</sup> T cell responses at week 14  
468 correlated with the number of challenges to infection or with peak viremia.

469  
470 Our challenge outcome results are consistent with other infant and adult NHP studies that failed  
471 to demonstrate efficacy against SIV or SHIV infection by antibodies with Fc-mediated effector  
472 function only (65-67) and human HIV vaccine trials following and building on the results of the  
473 RV144 trial did not observe a reduced HIV infection risk. In the RV144 trial protective ADCC

474 function was primarily associated with V1V2- and C1-specific antibodies (68, 69). Our vaccine  
475 regimen, however, appears to be biased towards the induction of V3 over V1V2-specific and C5  
476 versus C1-specific epitopes (35). Furthermore, plasma IgG responses specific to the V1V2  
477 region of the vaccine 1086.c Env and of the challenge virus SHIV1157(QNE)Y173H were of  
478 lower avidity compared to the relevant gp120-specific IgG. Limited plasma volumes prevented  
479 us from assessing ADCC and ADCP activity of epitope-specific antibodies in addition to gp120-  
480 specific antibodies in the current study. In future studies, more targeted, epitope-specific  
481 analyses - including impact of glycosylation and epitope conformation - may prove beneficial in  
482 the interpretation of vaccine outcomes (69, 70).

483         It is also important to note that the detailed analysis of RV144 results found that trial  
484 participants with medium levels of ADCC activity had reduced infection risk when compared to  
485 participants with low levels of ADCC activity, while there was no such difference when  
486 comparing those with high and low vaccine-induced ADCC responses (see supplement of (68)).  
487 In the current study, 1086.c-specific plasma antibodies with ADCC activity could be detected at  
488 a median endpoint titer of  $1:10^5$  at the time of challenge initiation. Paradoxically, although  
489 individual animals with ADCC titers  $>1:10^5$  were as likely to acquire infection as their control  
490 counterparts, high 1086.c ADCC titers  $>1:10^5$  appeared to be associated with fewer challenges  
491 to infection. One potential explanation for this observation is an *in vivo* prozone, a phenomenon  
492 when high antibody in the presence of limiting antigen results in smaller immune complexes that  
493 cluster fewer Fc domain receptors on the surface of target cells and limit killing activity (71, 72).  
494 A prozone effect was also described in an early HIV infection study (73) in which plasma IgG  
495 concentrations above  $10 \mu\text{g/ml}$  inhibited NK cell lysis. This data, and data from passive  
496 immunization of mice (74), suggest that there may be an optimal level, with lower and upper  
497 limits, at which non-neutralizing antibodies are most effective. However, what these levels are in  
498 the context of different exposures and how they potentially impact challenge outcome is not yet  
499 known.

500         Similarly, it is difficult to discern from the current literature whether there is an optimal  
501 ADCP score. Despite several studies suggesting a correlation between ADCP function and  
502 reduced HIV risk in human adults (75, 76) or SHIV infection in adult RM (25), ADCP activity  
503 elicited by the vaccine tested in the current study was not correlated with protection against oral  
504 SHIV1157(QNE)Y375H infection in infant RM. While the simple comparison of various antibody  
505 functions across different vaccine regimens, age groups, and challenge regimens is likely  
506 flawed, and different assay conditions may further impact data, the results of our study imply  
507 that the magnitude of ADCC or ADCP activity alone is not a reliable predictor of vaccine

508 efficacy. More research is needed to assess the impact of antibody subtype, effector cell and  
509 specific Fc receptors mediating the specific functions on vaccine efficacy in preclinical NHP  
510 studies (77) and how these findings translate to humans (78). Such findings would likely result  
511 in improved *in vitro* assays to measure antibody function and thereby enhance the predictive  
512 value of these assays for vaccine efficacy assessment. Highly relevant for pediatric studies,  
513 age-dependent differences in immune function of effector cells are not considered. There are  
514 numerous studies documenting that NK cells and monocytes exhibit reduced functional  
515 capacity, including ADCC (79) and phagocytosis, in infants compared to adults (see reviews by:  
516 (80-84). Few studies have examined the expression of FcR $\gamma$ I, FcR $\gamma$ II, and FcR $\gamma$ III on infant NK  
517 cells, monocytes, and neutrophils (85, 86). Therefore, in future studies, we will expand the  
518 analysis of vaccine-induced B and T cell responses and also determine whether and how  
519 pediatric HIV vaccine regimens impact innate immune cells and their functions.

520  
521 In summary, while the pre-challenge immunogenicity data demonstrated high magnitude  
522 effector antibody functions previously tied to some HIV vaccine efficacy, our results imply that  
523 Env-specific ADCC and ADCP responses induced by this candidate vaccine regimen were not  
524 sufficient to prevent infection with oral tier 2 SHIV1157(QNE)Y375H in infant RM. Therefore,  
525 future studies of interventions to protect infants against HIV acquisition through breastfeeding  
526 should focus at improving the breadth of the antibody response, namely the induction of bnAbs  
527 or passive administration of combinations of long-acting HIV bnAbs, as well as overcoming the  
528 relative paucity of cell-mediated immunity induced by current vaccine platforms in early life.

529

## 530 **ACKNOWLEDGEMENTS**

531  
532 The work was supported by National Institutes of Health grants 1R56 DE026321 (KDP), P01  
533 AI117915 (SP, KDP), T32 5108303 (ADC), T32AI007392-31 (SJB), the Office of Research  
534 Infrastructure Programs/OD P51OD011107 (to CNPRC), and the Center for AIDS Research  
535 award P30AI050410 (to UNC). The UNC Flow Cytometry Core Facility is supported in part  
536 by P30 CA016086 Cancer Center Core Support Grant to the UNC Lineberger Comprehensive  
537 Cancer Center. Research reported in this publication was supported by the Center for AIDS  
538 Research award number 5P30AI050410. The content is solely the responsibility of the authors  
539 and does not necessarily represent the official views of the National Institutes of Health.



540 We thank Sampa Santra (Harvard University) for kindly providing the SHIV-1157(QNE)Y173H  
541 viral stock, Dr. Tomáš Hanke (Oxford University, Oxford, UK) for the ChAdOx1.tSIVconsv239  
542 and MVA.tSIVconsv239 vaccines, and IDRI for 3M-052-SE

543  
544 We are grateful for technical assistance by the CNPRC staff, Jennifer Watanabe, Jodie  
545 Usachenko, Amir Ardeshir (CNPRC at UCD), Robert L. Wilson (LSUHSC), R. Whitney Edwards,  
546 Nicole Rodgers (Duke University), Neelima Choudary, and Ryan H. Tuck (UNC). The authors  
547 also acknowledge Celia LaBranche and colleagues (Duke University) for performing  
548 neutralization assays, and David J. Pickup (Duke University) for development and production of  
549 the recombinant MVA-based vaccine.

550 .  
551  
552 We thank Dr. J. Lifson, Rebecca Shoemaker and their colleagues in the Quantitative Molecular  
553 Diagnostics Core of the AIDS and Cancer Virus Program of the Frederick National Laboratory  
554 for expert assistance with viral load measurements.

555  
556  
557  
558  
559  
560  
561  
562  
563

564 **REFERENCES**

565

- 566 1. UNAIDS. 2018. Global HIV & AIDS Statistics - 2018 Fact Sheet. Accessed November 5.
- 567 2. Drake AL, Wagner A, Richardson B, John-Stewart G. 2014. Incident HIV during  
568 pregnancy and postpartum and risk of mother-to-child HIV transmission: a systematic  
569 review and meta-analysis. *PLoS Med* 11:e1001608.
- 570 3. Haas AD, Msukwa MT, Egger M, Tenthani L, Tweya H, Jahn A, Gadabu OJ, Tal K,  
571 Salazar-Vizcaya L, Estill J, Spoerri A, Phiri N, Chimbwandira F, van Oosterhout JJ,  
572 Keiser O. 2016. Adherence to Antiretroviral Therapy During and After Pregnancy: Cohort  
573 Study on Women Receiving Care in Malawi's Option B+ Program. *Clin Infect Dis*  
574 63:1227-1235.
- 575 4. Myer L, Phillips TK, McIntyre JA, Hsiao NY, Petro G, Zerbe A, Ramjith J, Bekker LG,  
576 Abrams EJ. 2017. HIV viraemia and mother-to-child transmission risk after antiretroviral  
577 therapy initiation in pregnancy in Cape Town, South Africa. *HIV Med* 18:80-88.
- 578 5. Moland KM, de Paoli MM, Sellen DW, van Esterik P, Leshabari SC, Blystad A. 2010.  
579 Breastfeeding and HIV: experiences from a decade of prevention of postnatal HIV  
580 transmission in sub-Saharan Africa. *Int Breastfeed J* 5:10.
- 581 6. Rollins N, Coovadia HM. 2013. Breastfeeding and HIV transmission in the developing  
582 world: past, present, future. *Curr Opin HIV AIDS* 8:467-73.
- 583 7. Rollins NC, Ndirangu J, Bland RM, Coutsooudis A, Coovadia HM, Newell ML. 2013.  
584 Exclusive breastfeeding, diarrhoeal morbidity and all-cause mortality in infants of HIV-  
585 infected and HIV uninfected mothers: an intervention cohort study in KwaZulu Natal,  
586 South Africa. *PLoS One* 8:e81307.
- 587 8. Nduati R, John G, Mbori-Ngacha D, Richardson B, Overbaugh J, Mwatha A, Ndinya-  
588 Achola J, Bwayo J, Onyango FE, Hughes J, Kreiss J. 2000. Effect of breastfeeding and  
589 formula feeding on transmission of HIV-1: a randomized clinical trial. *JAMA* 283:1167-  
590 74.
- 591 9. WHO. 2014. Global update on the Health Sector response to HIV, 2014.
- 592 10. Breastfeeding, Group HIVITS, Coutsooudis A, Dabis F, Fawzi W, Gaillard P, Haverkamp  
593 G, Harris DR, Jackson JB, Leroy V, Meda N, Msellati P, Newell ML, Nsuati R, Read JS,  
594 Wiktor S. 2004. Late postnatal transmission of HIV-1 in breast-fed children: an individual  
595 patient data meta-analysis. *J Infect Dis* 189:2154-66.
- 596 11. Taha TE, Hoover DR, Kumwenda NI, Fiscus SA, Kafulafula G, Nkhoma C, Chen S,  
597 Piwowar E, Broadhead RL, Jackson JB, Miotti PG. 2007. Late postnatal transmission of  
598 HIV-1 and associated factors. *J Infect Dis* 196:10-4.
- 599 12. Leroy V, Karon JM, Alioum A, Ekpini ER, van de Perre P, Greenberg AE, Msellati P,  
600 Hudgens M, Dabis F, Wiktor SZ, West Africa PSG. 2003. Postnatal transmission of HIV-  
601 1 after a maternal short-course zidovudine peripartum regimen in West Africa. *AIDS*  
602 17:1493-501.
- 603 13. Bispo S, Chikhungu L, Rollins N, Siegfried N, Newell ML. 2017. Postnatal HIV  
604 transmission in breastfed infants of HIV-infected women on ART: a systematic review  
605 and meta-analysis. *J Int AIDS Soc* 20:21251.
- 606 14. Cournil A, De Vincenzi I, Gaillard P, Cames C, Fao P, Luchters S, Rollins N, Newell ML,  
607 Bork K, Read JS, Kesho Bora Study G. 2013. Relationship between mortality and  
608 feeding modality among children born to HIV-infected mothers in a research setting: the  
609 Kesho Bora study. *AIDS* 27:1621-30.
- 610 15. Kuhn L, Aldrovandi GM, Sinkala M, Kankasa C, Semrau K, Kasonde P, Mwiya M, Tsai  
611 WY, Thea DM. 2009. Differential effects of early weaning for HIV-free survival of children  
612 born to HIV-infected mothers by severity of maternal disease. *PLoS one* 4:e6059.

- 613 16. Kuhn L, Aldrovandi GM, Sinkala M, Kankasa C, Semrau K, Mwiya M, Kasonde P, Scott  
614 N, Vwalika C, Walter J, Bulterys M, Tsai WY, Thea DM. 2008. Effects of early, abrupt  
615 weaning on HIV-free survival of children in Zambia. *The New England journal of*  
616 *medicine* 359:130-41.
- 617 17. Kuhn L, Stein Z, Susser M. 2004. Preventing mother-to-child HIV transmission in the  
618 new millennium: the challenge of breast feeding. *Paediatric and perinatal epidemiology*  
619 18:10-6.
- 620 18. Organization WH. 2010. Guidelines on HIV and Infant Feeding 2010: principles and  
621 recommendations for infant feeding in the context of HIV and a summary of evidence, *on*  
622 WHO. Accessed August 12.
- 623 19. Hessell AJ, Jaworski JP, Epton E, Matsuda K, Pandey S, Kahl C, Reed J, Sutton WF,  
624 Hammond KB, Cheever TA, Barnette PT, Legasse AW, Planer S, Stanton JJ, Pegu A,  
625 Chen X, Wang K, Siess D, Burke D, Park BS, Axthelm MK, Lewis A, Hirsch VM, Graham  
626 BS, Mascola JR, Sacha JB, Haigwood NL. 2016. Early short-term treatment with  
627 neutralizing human monoclonal antibodies halts SHIV infection in infant macaques. *Nat*  
628 *Med* 22:362-8.
- 629 20. Hessell AJ, Malherbe DC, Haigwood NL. 2018. Passive and active antibody studies in  
630 primates to inform HIV vaccines. *Expert Rev Vaccines* 17:127-144.
- 631 21. Hessell AJ, Shapiro MB, Powell R, Malherbe DC, McBurney SP, Pandey S, Cheever T,  
632 Sutton WF, Kahl C, Park B, Zolla-Pazner S, Haigwood NL. 2018. Reduced cell-  
633 associated DNA and improved viral control in macaques following passive transfer of a  
634 single anti-V2 monoclonal antibody and repeated SHIV challenges. *J Virol*  
635 doi:10.1128/JVI.02198-17.
- 636 22. McFarland EJ, Cunningham CK, Muresan P, Capparelli EV, Perlowski C, Morgan P,  
637 Smith B, Hazra R, Purdue L, Harding PA, Theron G, Mujuru H, Agwu A, Purswani M,  
638 Rathore MH, Flach B, Taylor A, Lin BC, McDermott AB, Mascola JR, Graham BS, team  
639 IP. 2021. Safety, Tolerability, and Pharmacokinetics of a Long-Acting Broadly  
640 Neutralizing HIV-1 Monoclonal Antibody VRC01LS in HIV-1-Exposed Newborn Infants. *J*  
641 *Infect Dis* doi:10.1093/infdis/jiab229.
- 642 23. Corey L, Gilbert PB, Juraska M, Montefiori DC, Morris L, Karuna ST, Edupuganti S,  
643 Mgodhi NM, deCamp AC, Rudnicki E, Huang Y, Gonzales P, Cabello R, Orrell C, Lama  
644 JR, Laher F, Lazarus EM, Sanchez J, Frank I, Hinojosa J, Sobieszczyk ME, Marshall  
645 KE, Mukwekwerere PG, Makhema J, Baden LR, Mullins JI, Williamson C, Hural J,  
646 McElrath MJ, Bentley C, Takuva S, Gomez Lorenzo MM, Burns DN, Espy N, Randhawa  
647 AK, Kochar N, Piwowar-Manning E, Donnell DJ, Sista N, Andrew P, Kublin JG, Gray G,  
648 Ledgerwood JE, Mascola JR, Cohen MS, Hvtm H, Teams HHS. 2021. Two Randomized  
649 Trials of Neutralizing Antibodies to Prevent HIV-1 Acquisition. *N Engl J Med* 384:1003-  
650 1014.
- 651 24. Mgodhi NM, Takuva S, Edupuganti S, Karuna S, Andrew P, Lazarus E, Garnett P, Shava  
652 E, Mukwekwerere PG, Kochar N, Marshall K, Rudnicki E, Juraska M, Anderson M, Karg  
653 C, Tindale I, Greene E, Luthuli N, Baepanye K, Hural J, Gomez Lorenzo MM, Burns D,  
654 Miner MD, Ledgerwood J, Mascola JR, Donnell D, Cohen MS, Corey L, Team HH. 2021.  
655 A Phase 2b Study to Evaluate the Safety and Efficacy of VRC01 Broadly Neutralizing  
656 Monoclonal Antibody in Reducing Acquisition of HIV-1 Infection in Women in Sub-  
657 Saharan Africa: Baseline Findings. *J Acquir Immune Defic Syndr* 87:680-687.
- 658 25. Ackerman ME, Das J, Pittala S, Broge T, Linde C, Suscovich TJ, Brown EP, Bradley T,  
659 Natarajan H, Lin S, Sassic JK, O'Keefe S, Mehta N, Goodman D, Sips M, Weiner JA,  
660 Tomaras GD, Haynes BF, Lauffenburger DA, Bailey-Kellogg C, Roederer M, Alter G.  
661 2018. Route of immunization defines multiple mechanisms of vaccine-mediated  
662 protection against SIV. *Nat Med* 24:1590-1598.

- 663 26. Barouch DH, Alter G, Broge T, Linde C, Ackerman ME, Brown EP, Borducchi EN, Smith  
664 KM, Nkolola JP, Liu J, Shields J, Parenteau L, Whitney JB, Abbink P, Ng'ang'a DM,  
665 Seaman MS, Lavine CL, Perry JR, Li W, Colantonio AD, Lewis MG, Chen B, Wenschuh  
666 H, Reimer U, Piatak M, Lifson JD, Handley SA, Virgin HW, Koutsoukos M, Lorin C, Voss  
667 G, Weijtens M, Pau MG, Schuitemaker H. 2015. Protective efficacy of adenovirus/protein  
668 vaccines against SIV challenges in rhesus monkeys. *Science* 349:320-4.
- 669 27. Barouch DH, Stephenson KE, Borducchi EN, Smith K, Stanley K, McNally AG, Liu J,  
670 Abbink P, Maxfield LF, Seaman MS, Dugast AS, Alter G, Ferguson M, Li W, Earl PL,  
671 Moss B, Giorgi EE, Szinger JJ, Eller LA, Billings EA, Rao M, Tovanabuttra S, Sanders-  
672 Buell E, Weijtens M, Pau MG, Schuitemaker H, Robb ML, Kim JH, Korber BT, Michael  
673 NL. 2013. Protective efficacy of a global HIV-1 mosaic vaccine against heterologous  
674 SHIV challenges in rhesus monkeys. *Cell* 155:531-9.
- 675 28. Bradley T, Pollara J, Santra S, Vandergrift N, Pittala S, Bailey-Kellogg C, Shen X, Parks  
676 R, Goodman D, Eaton A, Balachandran H, Mach LV, Saunders KO, Weiner JA, Scearce  
677 R, Sutherland LL, Phogat S, Tartaglia J, Reed SG, Hu SL, Theis JF, Pinter A, Montefiori  
678 DC, Kepler TB, Peachman KK, Rao M, Michael NL, Suscovich TJ, Alter G, Ackerman  
679 ME, Moody MA, Liao HX, Tomaras G, Ferrari G, Korber BT, Haynes BF. 2017.  
680 Pentavalent HIV-1 vaccine protects against simian-human immunodeficiency virus  
681 challenge. *Nat Commun* 8:15711.
- 682 29. Fouts TR, Bagley K, Prado IJ, Bobb KL, Schwartz JA, Xu R, Zagursky RJ, Egan MA,  
683 Eldridge JH, LaBranche CC, Montefiori DC, Le Buanec H, Zagury D, Pal R, Pavlakis  
684 GN, Felber BK, Franchini G, Gordon S, Vaccari M, Lewis GK, DeVico AL, Gallo RC.  
685 2015. Balance of cellular and humoral immunity determines the level of protection by  
686 HIV vaccines in rhesus macaque models of HIV infection. *Proc Natl Acad Sci U S A*  
687 112:E992-9.
- 688 30. Rerks-Ngarm S, Paris RM, Chunsutthiwat S, Prem Sri N, Namwat C, Bowonwatanuwong  
689 C, Li SS, Kaewkungkal J, Trichavaroj R, Churikanont N, de Souza MS, Andrews C,  
690 Francis D, Adams E, Flores J, Gurunathan S, Tartaglia J, O'Connell RJ, Eamsila C,  
691 Nitayaphan S, Ngaay V, Thongcharoen P, Kunasol P, Michael NL, Robb ML, Gilbert PB,  
692 Kim JH. 2013. Extended evaluation of the virologic, immunologic, and clinical course of  
693 volunteers who acquired HIV-1 infection in a phase III vaccine trial of ALVAC-HIV and  
694 AIDSVAX B/E. *J Infect Dis* 207:1195-205.
- 695 31. Asokan M, Dias J, Liu C, Maximova A, Ernste K, Pegu A, McKee K, Shi W, Chen X,  
696 Almasri C, Promsote W, Ambrozak DR, Gama L, Hu J, Douek DC, Todd JP, Lifson JD,  
697 Fourati S, Sekaly RP, Crowley AR, Ackerman ME, Ko SH, Kilam D, Boritz EA, Liao LE,  
698 Best K, Perelson AS, Mascola JR, Koup RA. 2020. Fc-mediated effector function  
699 contributes to the in vivo antiviral effect of an HIV neutralizing antibody. *Proc Natl Acad*  
700 *Sci U S A* 117:18754-18763.
- 701 32. Wang P, Gajjar MR, Yu J, Padte NN, Gettie A, Blanchard JL, Russell-Lodrigue K, Liao  
702 LE, Perelson AS, Huang Y, Ho DD. 2020. Quantifying the contribution of Fc-mediated  
703 effector functions to the antiviral activity of anti-HIV-1 IgG1 antibodies in vivo. *Proc Natl*  
704 *Acad Sci U S A* 117:18002-18009.
- 705 33. Phillips B, Fouda GG, Eudailey J, Pollara J, Curtis AD, 2nd, Kunz E, Dennis M, Shen X,  
706 Bay C, Hudgens M, Pickup D, Alam SM, Ardeshir A, Kozlowski PA, Van Rompay KKA,  
707 Ferrari G, Moody MA, Permar S, De Paris K. 2017. Impact of Poxvirus Vector Priming,  
708 Protein Coadministration, and Vaccine Intervals on HIV gp120 Vaccine-Elicited Antibody  
709 Magnitude and Function in Infant Macaques. *Clin Vaccine Immunol* 24:e00231-17.
- 710 34. Phillips B, Van Rompay KKA, Rodriguez-Nieves J, Lorin C, Koutsoukos M, Tomai M,  
711 Fox CB, Eudailey J, Dennis M, Alam SM, Hudgens M, Fouda G, Pollara J, Moody A,  
712 Shen X, Ferrari G, Permar S, De Paris K. 2018. Adjuvant-Dependent Enhancement of

- 713 HIV Env-Specific Antibody Responses in Infant Rhesus Macaques. *J Virol* 92:e01051-  
714 18.
- 715 35. Dennis M, Eudailey J, Pollara J, McMillan AS, Cronin KD, Saha PT, Curtis AD, Hudgens  
716 MG, Fouda GG, Ferrari G, Alam M, Van Rompay KKA, De Paris K, Permar S, Shen X.  
717 2019. Co-administration of CH31 broadly neutralizing antibody does not affect  
718 development of vaccine-induced anti-HIV-1 envelope antibody responses in infant  
719 Rhesus macaques. *J Virol* 93:e01783-18.
- 720 36. Curtis AD, 2nd, Walter KA, Nabi R, Jensen K, Dwivedi A, Pollara J, Ferrari G, Van  
721 Rompay KKA, Amara RR, Kozlowski PA, De Paris K. 2019. Oral Coadministration of an  
722 Intramuscular DNA/Modified Vaccinia Ankara Vaccine for Simian Immunodeficiency  
723 Virus Is Associated with Better Control of Infection in Orally Exposed Infant Macaques.  
724 *AIDS Res Hum Retroviruses* 35:310-325.
- 725 37. Moldt B, Le KM, Carnathan DG, Whitney JB, Schultz N, Lewis MG, Borducchi EN, Smith  
726 KM, Mackel JJ, Sweat SL, Hodges AP, Godzik A, Parren PW, Silvestri G, Barouch DH,  
727 Burton DR. 2016. Neutralizing antibody affords comparable protection against vaginal  
728 and rectal simian/human immunodeficiency virus challenge in macaques. *AIDS* 30:1543-  
729 51.
- 730 38. Van Rompay KKA, Curtis AD, Hudgens M, Tuck R, Choudhari N, Dennis M, Goswami R,  
731 Nelson A, Ruprecht RM, Shaw GM, Permar SR, De Paris K. 2019. Oral clade C SHIV  
732 challenge models to study pediatric HIV infection by breastmilk transmission.  
733 *BIORXIV*:<https://doi.org/10.1101/545699>.
- 734 39. Jensen K, Nabi R, Van Rompay KK, Robichaux S, Lifson JD, Piatak M, Jr., Jacobs WR,  
735 Jr., Fennelly G, Canfield D, Mollan KR, Hudgens MG, Larsen MH, Amedee AM,  
736 Kozlowski PA, De Paris K. 2016. Vaccine-Elicited Mucosal and Systemic Antibody  
737 Responses Are Associated with Reduced Simian Immunodeficiency Viremia in Infant  
738 Rhesus Macaques. *J Virol* 90:7285-302.
- 739 40. Fouda GG, Eudailey J, Kunz EL, Amos JD, Liebl BE, Himes J, Boakye-Agyeman F,  
740 Beck K, Michaels AJ, Cohen-Wolkowicz M, Haynes BF, Reimann KA, Permar SR. 2016.  
741 Systemic administration of an HIV-1 broadly neutralizing dimeric IgA yields mucosal  
742 secretory IgA and virus neutralization. *Mucosal Immunol* doi:10.1038/mi.2016.32.
- 743 41. Kozlowski PA, Lynch RM, Patterson RR, Cu-Uvin S, Flanigan TP, Neutra MR. 2000.  
744 Modified wick method using Weck-Cel sponges for collection of human rectal secretions  
745 and analysis of mucosal HIV antibody. *Journal of acquired immune deficiency*  
746 *syndromes* 24:297-309.
- 747 42. Curtis AD, 2nd, Dennis M, Eudailey J, Walter KL, Cronin K, Alam SM, Choudhary N,  
748 Tuck RH, Hudgens M, Kozlowski PA, Pollara J, Ferrari G, Van Rompay KKA, Permar S,  
749 De Paris K. 2020. HIV Env-Specific IgG Antibodies Induced by Vaccination of Neonatal  
750 Rhesus Macaques Persist and Can Be Augmented by a Late Booster Immunization in  
751 Infancy. *mSphere* 5:e00162-20.
- 752 43. Koene HR, Kleijer M, Algra J, Roos D, von dem Borne AE, de Haas M. 1997. Fc  
753 gammaRIIIa-158V/F polymorphism influences the binding of IgG by natural killer cell Fc  
754 gammaRIIIa, independently of the Fc gammaRIIIa-48L/R/H phenotype. *Blood* 90:1109-  
755 14.
- 756 44. Garcia A, Keinonen S, Sanchez AM, Ferrari G, Denny TN, Moody MA. 2014. Leukopak  
757 PBMC sample processing for preparing quality control material to support proficiency  
758 testing programs. *J Immunol Methods* 409:99-106.
- 759 45. Sambor A, Garcia A, Berrong M, Pickeral J, Brown S, Rountree W, Sanchez A, Pollara  
760 J, Frahm N, Keinonen S, Kijak GH, Roederer M, Levine G, D'Souza MP, Jaimes M,  
761 Koup R, Denny T, Cox J, Ferrari G. 2014. Establishment and maintenance of a PBMC  
762 repository for functional cellular studies in support of clinical vaccine trials. *J Immunol*  
763 *Methods* 409:107-16.

- 764 46. Pollara J, Jones D, Huffmann T, Edwards R, Dennis M, L'i S, Jha S, Goodman D, Kumar  
765 A, LaBrance C, Montefiori D, Fouda G, Hope T, TOMaras G, Staats H, Ferrari G,  
766 Permar S. 2019. Bridging vaccine-induced HIV-1 neutralizing and effector antibody  
767 responses in rabbit and rhesus macaque animal models. *Journal of Virology* 93:e02119-  
768 18.
- 769 47. Edmonds TG, Ding H, Yuan X, Wei Q, Smith KS, Conway JA, Wiczorek L, Brown B,  
770 Polonis V, West JT, Montefiori DC, Kappes JC, Ochsenbauer C. 2010. Replication  
771 competent molecular clones of HIV-1 expressing Renilla luciferase facilitate the analysis  
772 of antibody inhibition in PBMC. *Virology* 408:1-13.
- 773 48. Tay MZ, Liu P, Williams LD, McRaven MD, Sawant S, Gurley TC, Xu TT, Dennison SM,  
774 Liao HX, Chenine AL, Alam SM, Moody MA, Hope TJ, Haynes BF, Tomaras GD. 2016.  
775 Antibody-Mediated Internalization of Infectious HIV-1 Virions Differs among Antibody  
776 Isotypes and Subclasses. *PLoS Pathog* 12:e1005817.
- 777 49. Ackerman ME, Moldt B, Wyatt RT, Dugast AS, McAndrew E, Tsoukas S, Jost S, Berger  
778 CT, Sciaranghella G, Liu Q, Irvine DJ, Burton DR, Alter G. 2011. A robust, high-  
779 throughput assay to determine the phagocytic activity of clinical antibody samples. *J*  
780 *Immunol Methods* 366:8-19.
- 781 50. Pardi N, LaBranche CC, Ferrari G, Cain DW, Tombacz I, Parks RJ, Muramatsu H, Mui  
782 BL, Tam YK, Kariko K, Polacino P, Barbosa CJ, Madden TD, Hope MJ, Haynes BF,  
783 Montefiori DC, Hu SL, Weissman D. 2019. Characterization of HIV-1 Nucleoside-  
784 Modified mRNA Vaccines in Rabbits and Rhesus Macaques. *Mol Ther Nucleic Acids*  
785 15:36-47.
- 786 51. Montefiori DC. 2009. Measuring HIV neutralization in a luciferase reporter gene assay.  
787 *Methods Mol Biol* 485:395-405.
- 788 52. Jensen K, Pena MG, Wilson RL, Ranganathan UD, Jacobs WR, Jr., Fennelly G, Larsen  
789 M, Van Rompay KK, Kozlowski PA, Abel K. 2013. A neonatal oral Mycobacterium  
790 tuberculosis-SIV prime / intramuscular MVA-SIV boost combination vaccine induces  
791 both SIV and Mtb-specific immune responses in infant macaques. *Trials Vaccinol* 2:53-  
792 63.
- 793 53. Hladik F, McElrath MJ. 2008. Setting the stage: host invasion by HIV. *Nat Rev Immunol*  
794 8:447-57.
- 795 54. Chenine AL, Siddappa NB, Kramer VG, Sciaranghella G, Rasmussen RA, Lee SJ,  
796 Santosuosso M, Poznansky MC, Velu V, Amara RR, Souder C, Anderson DC, Villinger  
797 F, Else JG, Novembre FJ, Strobert E, O'Neil SP, Secor WE, Ruprecht RM. 2010.  
798 Relative transmissibility of an R5 clade C simian-human immunodeficiency virus across  
799 different mucosae in macaques parallels the relative risks of sexual HIV-1 transmission  
800 in humans via different routes. *J Infect Dis* 201:1155-63.
- 801 55. Jensen K, Dela Pena-Ponce MG, Piatak M, Jr., Shoemaker R, Oswald K, Jacobs WR,  
802 Jr., Fennelly G, Lucero C, Mollan KR, Hudgens MG, Amedee A, Kozlowski PA, Estes  
803 JD, Lifson JD, Van Rompay KK, Larsen M, De Paris K. 2016. Balancing trained  
804 immunity with persistent immune activation and the risk of SIV infection in infant  
805 macaques vaccinated with attenuated Mycobacterium tuberculosis or BCG vaccines.  
806 *Clin Vaccine Immunol* doi:10.1128/CVI.00360-16.
- 807 56. Eudailey JA, Dennis ML, Parker ME, Phillips BL, Huffman TN, Bay CP, Hudgens MG,  
808 Wiseman RW, Pollara JJ, Fouda GG, Ferrari G, Pickup DJ, Kozlowski PA, Van Rompay  
809 KKA, De Paris K, Permar SR. 2018. Maternal HIV-1 Env Vaccination for Systemic and  
810 Breast Milk Immunity To Prevent Oral SHIV Acquisition in Infant Macaques. *mSphere*  
811 3:e00505-17.
- 812 57. Gomez-Roman VR, Patterson LJ, Venzon D, Liewehr D, Aldrich K, Florese R, Robert-  
813 Guroff M. 2005. Vaccine-elicited antibodies mediate antibody-dependent cellular

- 814 cytotoxicity correlated with significantly reduced acute viremia in rhesus macaques  
815 challenged with SIVmac251. *J Immunol* 174:2185-9.
- 816 58. Xiao P, Zhao J, Patterson LJ, Brocca-Cofano E, Venzon D, Kozlowski PA, Hidajat R,  
817 Demberg T, Robert-Guroff M. 2010. Multiple vaccine-elicited nonneutralizing  
818 anti-envelope antibody activities contribute to protective efficacy by reducing both acute  
819 and chronic viremia following simian/human immunodeficiency virus SHIV89.6P  
820 challenge in rhesus macaques. *J Virol* 84:7161-73.
- 821 59. Alpert MD, Harvey JD, Lauer WA, Reeves RK, Piatak M, Jr., Carville A, Mansfield KG,  
822 Lifson JD, Li W, Desrosiers RC, Johnson RP, Evans DT. 2012. ADCC develops over  
823 time during persistent infection with live-attenuated SIV and is associated with complete  
824 protection against SIV(mac)251 challenge. *PLoS Pathog* 8:e1002890.
- 825 60. Sheets RL, Zhou T, Knezevic I. 2016. Review of efficacy trials of HIV-1/AIDS vaccines  
826 and regulatory lessons learned: A review from a regulatory perspective. *Biologicals*  
827 44:73-89.
- 828 61. Qureshi H, Genesca M, Fritts L, McChesney MB, Robert-Guroff M, Miller CJ. 2014.  
829 Infection with host-range mutant adenovirus 5 suppresses innate immunity and induces  
830 systemic CD4+ T cell activation in rhesus macaques. *PLoS One* 9:e106004.
- 831 62. Naranbhai V, Abdool Karim SS, Altfeld M, Samsunder N, Durgiah R, Sibeko S, Abdool  
832 Karim Q, Carr WH, team CT. 2012. Innate immune activation enhances hiv acquisition in  
833 women, diminishing the effectiveness of tenofovir microbicide gel. *J Infect Dis* 206:993-  
834 1001.
- 835 63. Huang Y, Duerr A, Frahm N, Zhang L, Moodie Z, De Rosa S, McElrath MJ, Gilbert PB.  
836 2014. Immune-correlates analysis of an HIV-1 vaccine efficacy trial reveals an  
837 association of nonspecific interferon-gamma secretion with increased HIV-1 infection  
838 risk: a cohort-based modeling study. *PLoS One* 9:e108631.
- 839 64. Hammer SM, Sobieszczyk ME, Janes H, Karuna ST, Mulligan MJ, Grove D, Koblin BA,  
840 Buchbinder SP, Keefer MC, Tomaras GD, Frahm N, Hural J, Anude C, Graham BS,  
841 Enama ME, Adams E, DeJesus E, Novak RM, Frank I, Bentley C, Ramirez S, Fu R,  
842 Koup RA, Mascola JR, Nabel GJ, Montefiori DC, Kublin J, McElrath MJ, Corey L, Gilbert  
843 PB, Team HS. 2013. Efficacy trial of a DNA/rAd5 HIV-1 preventive vaccine. *N Engl J*  
844 *Med* 369:2083-92.
- 845 65. Pauthner MG, Nkolola JP, Havenar-Daughton C, Murrell B, Reiss SM, Bastidas R,  
846 Prevost J, Nedellec R, von Bredow B, Abbink P, Cottrell CA, Kulp DW, Tokatlian T,  
847 Nogal B, Bianchi M, Li H, Lee JH, Butera ST, Evans DT, Hangartner L, Finzi A, Wilson  
848 IA, Wyatt RT, Irvine DJ, Schief WR, Ward AB, Sanders RW, Crotty S, Shaw GM,  
849 Barouch DH, Burton DR. 2018. Vaccine-Induced Protection from Homologous Tier 2  
850 SHIV Challenge in Nonhuman Primates Depends on Serum-Neutralizing Antibody  
851 Titers. *Immunity* doi:10.1016/j.immuni.2018.11.011.
- 852 66. Florese RH, Van Rompay KK, Aldrich K, Forthal DN, Landucci G, Mahalanabis M,  
853 Haigwood N, Venzon D, Kalyanaraman VS, Marthas ML, Robert-Guroff M. 2006.  
854 Evaluation of passively transferred, nonneutralizing antibody-dependent cellular  
855 cytotoxicity-mediating IgG in protection of neonatal rhesus macaques against oral  
856 SIVmac251 challenge. *J Immunol* 177:4028-36.
- 857 67. Dugast AS, Chan Y, Hoffner M, Licht A, Nkolola J, Li H, Streeck H, Suscovich TJ,  
858 Ghebremichael M, Ackerman ME, Barouch DH, Alter G. 2014. Lack of protection  
859 following passive transfer of polyclonal highly functional low-dose non-neutralizing  
860 antibodies. *PLoS One* 9:e97229.
- 861 68. Haynes BF, Gilbert PB, McElrath MJ, Zolla-Pazner S, Tomaras GD, Alam SM, Evans  
862 DT, Montefiori DC, Karnasuta C, Sutthent R, Liao HX, DeVico AL, Lewis GK, Williams C,  
863 Pinter A, Fong Y, Janes H, DeCamp A, Huang Y, Rao M, Billings E, Karasavvas N,  
864 Robb ML, Ngauy V, de Souza MS, Paris R, Ferrari G, Bailer RT, Soderberg KA,

- 865 Andrews C, Berman PW, Frahm N, De Rosa SC, Alpert MD, Yates NL, Shen X, Koup  
866 RA, Pitisuttithum P, Kaewkungwal J, Nitayaphan S, Rerks-Ngarm S, Michael NL, Kim  
867 JH. 2012. Immune-correlates analysis of an HIV-1 vaccine efficacy trial. *The New*  
868 *England Journal of Medicine* 366:1275-86.
- 869 69. Pollara J, Bonsignori M, Moody MA, Liu P, Alam SM, Hwang KK, Gurley TC, Kozink DM,  
870 Armand LC, Marshall DJ, Whitesides JF, Kaewkungwal J, Nitayaphan S, Pitisuttithum P,  
871 Rerks-Ngarm S, Robb ML, O'Connell RJ, Kim JH, Michael NL, Montefiori DC, Tomaras  
872 GD, Liao HX, Haynes BF, Ferrari G. 2014. HIV-1 vaccine-induced C1 and V2 Env-  
873 specific antibodies synergize for increased antiviral activities. *J Virol* 88:7715-26.
- 874 70. Lewis GK, Finzi A, DeVico AL, Pazgier M. 2015. Conformational Masking and Receptor-  
875 Dependent Unmasking of Highly Conserved Env Epitopes Recognized by Non-  
876 Neutralizing Antibodies That Mediate Potent ADCC against HIV-1. *Viruses* 7:5115-32.
- 877 71. Lu LL, Suscovich TJ, Fortune SM, Alter G. 2018. Beyond binding: antibody effector  
878 functions in infectious diseases. *Nat Rev Immunol* 18:46-61.
- 879 72. Lewis GK. 2013. Qualitative and quantitative variables that affect the potency of Fc-  
880 mediated effector function in vitro and in vivo: considerations for passive immunization  
881 using non-neutralizing antibodies. *Curr HIV Res* 11:354-64.
- 882 73. Parker SJ, Sadlon TA, Gordon DL. 1995. Enhancement of NK cell-mediated antibody-  
883 dependent lysis of recombinant gp120-coated CD4 cells by complement. *J Infect Dis*  
884 171:186-9.
- 885 74. Taborda CP, Rivera J, Zaragoza O, Casadevall A. 2003. More is not necessarily better:  
886 prozone-like effects in passive immunization with IgG. *J Immunol* 170:3621-30.
- 887 75. Li SS, Gilbert PB, Carpp LN, Pyo CW, Janes H, Fong Y, Shen X, Neidich SD, Goodman  
888 D, deCamp A, Cohen KW, Ferrari G, Hammer SM, Sobieszczyk ME, Mulligan MJ,  
889 Buchbinder SP, Keefer MC, DeJesus E, Novak RM, Frank I, McElrath MJ, Tomaras GD,  
890 Geraghty DE, Peng X. 2019. Fc Gamma Receptor Polymorphisms Modulated the  
891 Vaccine Effect on HIV-1 Risk in the HVTN 505 HIV Vaccine Trial. *J Virol* 93.
- 892 76. Neidich SD, Fong Y, Li SS, Geraghty DE, Williamson BD, Young WC, Goodman D,  
893 Seaton KE, Shen X, Sawant S, Zhang L, deCamp AC, Blette BS, Shao M, Yates NL,  
894 Feely F, Pyo CW, Ferrari G, Team H, Frank I, Karuna ST, Swann EM, Mascola JR,  
895 Graham BS, Hammer SM, Sobieszczyk ME, Corey L, Janes HE, McElrath MJ, Gottardo  
896 R, Gilbert PB, Tomaras GD. 2019. Antibody Fc effector functions and IgG3 associate  
897 with decreased HIV-1 risk. *J Clin Invest* 129:4838-4849.
- 898 77. Su B, Dispinseri S, Iannone V, Zhang T, Wu H, Carapito R, Bahram S, Scarlatti G, Moog  
899 C. 2019. Update on Fc-Mediated Antibody Functions Against HIV-1 Beyond  
900 Neutralization. *Front Immunol* 10:2968.
- 901 78. Pollara J, Tay MZ, Edwards RW, Goodman D, Crowley AR, Edwards RJ, Easterhoff D,  
902 Conley HE, Hoxie T, Gurley T, Jones C, Machiele E, Tuyishime M, Donahue E, Jha S,  
903 Spreng RL, Hope TJ, Wiehe K, He MM, Moody MA, Saunders KO, Ackerman ME,  
904 Ferrari G, Tomaras GD. 2021. Functional Homology for Antibody-Dependent  
905 Phagocytosis Across Humans and Rhesus Macaques. *Front Immunol* 12:678511.
- 906 79. Hallberg A, Malmstrom P. 1982. Natural killer cell activity and antibody-dependent  
907 cellular cytotoxicity in newborn infants. *Acta Paediatr Scand* 71:431-6.
- 908 80. PrabhuDas M, Adkins B, Gans H, King C, Levy O, Ramilo O, Siegrist CA. 2011.  
909 Challenges in infant immunity: implications for responses to infection and vaccines.  
910 *Nature Immunology* 12:189-94.
- 911 81. Kollmann TR, Kampmann B, Mazmanian SK, Marchant A, Levy O. 2017. Protecting the  
912 Newborn and Young Infant from Infectious Diseases: Lessons from Immune Ontogeny.  
913 *Immunity* 46:350-363.
- 914 82. Smolen KK, Ruck CE, Fortuno ES, 3rd, Ho K, Dimitriu P, Mohn WW, Speert DP, Cooper  
915 PJ, Esser M, Goetghebuer T, Marchant A, Kollmann TR. 2014. Pattern recognition



- 916 receptor-mediated cytokine response in infants across 4 continents. *J Allergy Clin*  
917 *Immunol* 133:818-26 e4.
- 918 83. Corbett NP, Blimkie D, Ho KC, Cai B, Sutherland DP, Kallos A, Crabtree J, Rein-Weston  
919 A, Lavoie PM, Turvey SE, Hawkins NR, Self SG, Wilson CB, Hajjar AM, Fortuno ES,  
920 3rd, Kollmann TR. 2010. Ontogeny of Toll-like receptor mediated cytokine responses of  
921 human blood mononuclear cells. *PLoS One* 5:e15041.
- 922 84. Levy O. 2007. Innate immunity of the newborn: basic mechanisms and clinical  
923 correlates. *Nature reviews Immunology* 7:379-90.
- 924 85. Kohl S, Loo LS, Gonik B. 1984. Analysis in human neonates of defective antibody-  
925 dependent cellular cytotoxicity and natural killer cytotoxicity to herpes simplex virus-  
926 infected cells. *J Infect Dis* 150:14-9.
- 927 86. Fairchild KD, Hudson RG, Douglas SD, McKenzie SE, Polin RA. 1996. Effect of gamma  
928 interferon on expression of Fc gamma receptors in monocytes of newborn infants and  
929 adults. *Clin Diagn Lab Immunol* 3:464-9.
- 930
- 931
- 932

933 **FIGURE LEGENDS**

934

935 **Figure 1: Experimental design.** In the vaccine group, 12 neonatal rhesus macaques (Table 1)  
936 were immunized with  $2 \times 10^8$  PFU MVA-HIV Env (blue circle), HIV Env protein (15  $\mu$ g) mixed with  
937 3M-052-SE (brown hexagon), and  $5 \times 10^{10}$  ChAdOx1.tSIVconsv239 viral particles (light grey  
938 triangle) at week 0. Booster immunizations of  $2 \times 10^8$  PFU each of MVA-HIV Env, HIV Env protein  
939 in 3M-052-SE, and MVA.tSIVconsv239 (dark grey diamond) were provided at weeks 6 and 12.  
940 A second cohort of 12 age-matched RM received control MVA (orange circle) immunizations at  
941 weeks 0, 6, and 12. Beginning at week 15, animals were challenged weekly with SHIV-  
942 1157(QNE)Y173H viral stock diluted 1:1000 in RPMI until infected. After 13 exposures,  
943 uninfected infants (n=11) were exposed to a 1:100 SHIV dose for 7 weeks, a dose that was  
944 increased to 1:10 for seven more exposures in animals not infected by the 1:100 dose (n=4).  
945 Two infants remained negative and became infected after challenge with 1:2 dilution of virus  
946 stock (RM19) or undiluted (1:1) virus (RM10), respectively (Table 1). SHIV exposures are  
947 indicated by arrows with distinct shades of red based on virus dilution.

948

949 **Figure 2: C.1086 Env-specific antibody responses.** Plasma (filled blue circles) concentration  
950 of 1086.c gp120-specific IgG (Panel A) and IgA (Panel B) were measured by ELISA and BAMA,  
951 respectively. Salivary IgG and IgA levels (empty blue circles), measured by BAMA, are reported  
952 as specific activity in ng of 1086.c gp120 IgG or IgA per  $\mu$ g of total IgG (Panel C) or IgA (Panel  
953 D). Dashed lines represent the cut-off for positivity defined as mean antibody levels in control  
954 animals plus 3 standard deviations (SD). Panels E and F illustrate the Spearman correlation  
955 between plasma and saliva vaccine-induced IgG or IgA levels, respectively.

956

957 **Figure 3: Pre-challenge antibody function of vaccinated infant macaques.** Panel A: Avidity  
958 Score, determined by SPR, of week 15 plasma IgG specific for 1086.c gp120 or V1V2, or for the  
959 consensus clade C V3 (gp70). Each symbol represents a single animal. Panel B: Tier 1b clade  
960 C I6644.v2.c33 neutralization titers of vaccinated infants at weeks 14 (empty circles) and week  
961 15 (filled circles). Panels C and D: Longitudinal data for ADCC endpoint titers and maximum  
962 granzyme B activity, with each line representing an individual animal. Dashed lines indicate the  
963 limit of detection. Panel E: ADCP Scores for vaccinated animals prior to vaccination at week 0  
964 (empty circles) and week 14 (filled circles). Panel F: The ability of plasma IgG binding to cells  
965 infected with HIV 1086.c are shown over time for individual vaccinated animals.

966

967 **Figure 4: Vaccine-induced 1157ipd3N4 and SHIV1157(QNE)Y175H Env-specific antibody**  
968 **responses.**

969 Panel A: Plasma concentration of 1157ipd3N4 gp120-specific IgG (blue triangles) over time.  
970 Panel B: Avidity scores of plasma IgG specific for 1157ipd3N4 gp120 (blue triangles) or gp70-  
971 V1V2 SHIV1157(QNE)Y375H (blue star symbols). Each symbol represents an individual animal;  
972 horizontal lines represent the median. Panel C: ADCC endpoint titers for plasma antibodies  
973 specific to 1157ipd3N4 gp120 (blue triangles).

974

975 **Figure 5: SIV Gag-specific T cell responses in PBMC and peripheral lymph nodes at week**  
976 **14.** Each bar in Panels A and B represents the sum of single cytokine responses of SIV Gag-  
977 specific CD4<sup>+</sup> (left graphs) or CD8<sup>+</sup> T cells (right graphs) for each vaccinated animal at week 14  
978 in PBMC (Panel A) or lymph nodes (Panel B). Cytokines measured include IFN- $\gamma$  (fuchsia), IL-2  
979 (yellow), IL-17 (dark blue), and TNF- $\alpha$  (light blue).

980

981 **Figure 6: Challenge outcome.** Panel A: Longitudinal plasma viral load as assessed by RT-  
982 PCR from control and vaccinated cohorts of infant RM are displayed. Shaded areas represent  
983 the challenge dose: light gray, 1:000, weeks 0-13; medium gray, 1:100, weeks 14-21; dark gray,  
984 1:10, weeks 22-28; darkest gray, 1:2 or undiluted. Panel B: The number of challenges required  
985 for infection is plotted for control and vaccinated animals. Horizontal lines represent the median.  
986 Panel C: Kaplan-Meier survival curves for any dose of viral stock dilutions are shown for control  
987 and vaccinated infants. Panel D: Peak viremia in control and vaccinated animals. Control and  
988 vaccinated animals are indicated by orange or blue lines/symbols, respectively, with each  
989 symbol representing an individual animal; horizontal lines indicate the median.

990

991 **Figure 7: Correlation between ADCC endpoint titers and challenge outcome.** Panel A:  
992 Graph of the Spearman rank correlation between ADCC endpoint titers and number of  
993 challenges required for infection of each vaccinated animal. Panel B: Kaplan Meier plot to  
994 demonstrate the relationship between ADCC endpoint titers and number of challenges required  
995 for infection when vaccinated animals are categorized as having a low (blue dashed line) or high  
996 (dotted blue line) ADCC titer based on the median ADCC endpoint titer of  $10^5$  in comparison to  
997 control animals (orange line). Mantel-Cox log rank test was applied to determine differences in  
998 the risk of infection between groups.

999

1000 **Figure 8: CD4<sup>+</sup> T cell activation.** PBMC from week 15 after vaccination were gated on  
1001 CD3<sup>+</sup>CD4<sup>+</sup> T cells and assessed for surface expression of CD195 (CCR5), CD69, and CD279  
1002 (PD1), and intracellular expression of Ki-67 and TNF- $\alpha$ . TNF- $\alpha$  positive T cell frequencies  
1003 between control (orange circles) and vaccinated (blue circles) animals were compared by Mann-  
1004 Whitney test.

1005

1006

**Table 1: Summary of study animals**

| Group   | Animal ID | Sex    | Age (days) at 1 <sup>st</sup> . Immunization | Challenges to Infection | Infecting Dose | Peak Viremia (copies/ml) |
|---------|-----------|--------|----------------------------------------------|-------------------------|----------------|--------------------------|
| Mock    | RM1       | Female | 8                                            | 17                      | 1:100          | 5.1x10 <sup>7</sup>      |
| Mock    | RM2       | Male   | 8                                            | 3                       | 1:1000         | 1.3x10 <sup>8</sup>      |
| Mock    | RM3       | Male   | 6                                            | 13                      | 1:1000         | 2.5x10 <sup>6</sup>      |
| Mock    | RM4       | Female | 6                                            | 14                      | 1:100          | 7.1x10 <sup>5</sup>      |
| Mock    | RM5       | Male   | 5                                            | 7                       | 1:1000         | 7.6x10 <sup>6</sup>      |
| Mock    | RM6       | Female | 4                                            | 4                       | 1:1000         | 1.3x10 <sup>8</sup>      |
| Mock    | RM7       | Female | 10                                           | 8                       | 1:1000         | 8.9x10 <sup>6</sup>      |
| Mock    | RM8       | Male   | 10                                           | 15                      | 1:100          | 4.3x10 <sup>7</sup>      |
| Mock    | RM9       | Female | 7                                            | 2                       | 1:1000         | 2.1x10 <sup>7</sup>      |
| Mock    | RM10      | Male   | 7                                            | 30                      | undiluted      | 3.1x10 <sup>4</sup>      |
| Mock    | RM11      | Male   | 6                                            | 2                       | 1:1000         | 1.6x10 <sup>7</sup>      |
| Mock    | RM12      | Male   | 4                                            | 3                       | 1:1000         | 3.5x10 <sup>8</sup>      |
| Vaccine | RM13      | Female | 8                                            | 3                       | 1:1000         | 5.3x10 <sup>6</sup>      |
| Vaccine | RM14      | Male   | 7                                            | 15                      | 1:100          | 1.7x10 <sup>7</sup>      |
| Vaccine | RM15      | Male   | 5                                            | 24                      | 1:10           | 5.1x10 <sup>5</sup>      |
| Vaccine | RM16      | Male   | 5                                            | 1                       | 1:1000         | 2.0x10 <sup>6</sup>      |
| Vaccine | RM17      | Male   | 4                                            | 4                       | 1:1000         | 1.1x10 <sup>6</sup>      |
| Vaccine | RM18      | Male   | 3                                            | 2                       | 1:1000         | 1.2x10 <sup>7</sup>      |
| Vaccine | RM19      | Female | 8                                            | 28                      | 1:2            | 9.7x10 <sup>6</sup>      |
| Vaccine | RM20      | Male   | 8                                            | 3                       | 1:1000         | 4.7x10 <sup>6</sup>      |
| Vaccine | RM21      | Female | 7                                            | 7                       | 1:1000         | 2.1x10 <sup>6</sup>      |
| Vaccine | RM22      | Male   | 7                                            | 15                      | 1:100          | 4.5x10 <sup>7</sup>      |
| Vaccine | RM23      | Female | 6                                            | 20                      | 1:100          | 5.3x10 <sup>7</sup>      |
| Vaccine | RM24      | Male   | 6                                            | 23                      | 1:10           | 1.4x10 <sup>7</sup>      |

**Table 3: Correlation between Immune Parameters and Number of Challenges to Infection**

| Parameter                                   | N  | Spearman Correlation<br>r value | p value <sup>c</sup> | FDR <sup>a,b</sup><br>p-value | Figure |
|---------------------------------------------|----|---------------------------------|----------------------|-------------------------------|--------|
| <b>Env-specific IgG<sup>a</sup></b>         |    |                                 |                      |                               |        |
| 1086.c                                      | 12 | -0.519                          | 0.0864               | 0.4043                        | 2A     |
| 1157ipd3N4                                  | 12 | -0.470                          | 0.1246               | 0.4043                        | 4A     |
| <b>Plasma IgM<sup>a</sup></b>               | 11 | -0.288                          | 0.3885               | 0.5651                        |        |
| <b>Salivary IgG<sup>a</sup></b>             | 12 | -0.456                          | 0.1373               | 0.4043                        | 2C     |
| <b>Salivary IgA<sup>a</sup></b>             | 12 | -0.189                          | 0.5516               | 0.6304                        |        |
| <b>Avidity Index<sup>a</sup></b>            |    |                                 |                      |                               |        |
| 1086.c                                      | 12 | -0.368                          | 0.2365               | 0.4553                        | 3A     |
| 1157ipd3N4                                  | 12 | -0.165                          | 0.6064               | 0.6468                        | 4B     |
| SHIV1157(QNE)Y175H                          | 10 | -0.372                          | 0.2880               | 0.4608                        | 4B     |
| 1086.C V1V2                                 | 11 | -0.119                          | 0.7282               | 0.7282                        | 3A     |
| gp70 ConsC V3                               | 12 | -0.428                          | 0.1655               | 0.4043                        | 3A     |
| <b>ADCC Titer<sup>a</sup></b>               |    |                                 |                      |                               |        |
| 1086.c                                      | 12 | -0.761                          | 0.0054               | 0.0870                        | 3C     |
| 1157ipd3N4                                  | 12 | -0.568                          | 0.0580               | 0.4043                        | 4C     |
| <b>ADCC Activity<sup>a</sup></b>            |    |                                 |                      |                               |        |
| 1086.c                                      | 12 | -0.354                          | 0.2561               | 0.4553                        | 3D     |
| 1157ipd3N4                                  | 12 | -0.418                          | 0.1769               | 0.4043                        |        |
| <b>ADCP Score<sup>a</sup></b>               | 12 | -0.193                          | 0.5455               | 0.6304                        | 3E     |
| <b>Infected Cell Binding<sup>a</sup></b>    | 12 | 0.242                           | 0.4446               | 0.5928                        | 3F     |
| <b>T Cell Activation<sup>b</sup></b>        |    |                                 |                      |                               |        |
| CCR5 <sup>+</sup> CD4 <sup>+</sup>          | 24 | -0.065                          | 0.7631               | 0.7648                        | 7      |
| Ki67 <sup>+</sup> CD4 <sup>+</sup>          | 24 | -0.161                          | 0.4499               | 0.6748                        | 7      |
| CD69 <sup>+</sup> CD4 <sup>+</sup>          | 24 | 0.379                           | 0.0688               | 0.4131                        | 7      |
| PD1 <sup>+</sup> CD4 <sup>+</sup>           | 24 | -0.064                          | 0.7648               | 0.7648                        | 7      |
| TNF- $\alpha$ <sup>+</sup> CD4 <sup>+</sup> | 24 | -0.182                          | 0.3913               | 0.6748                        | 7      |
| <b>Env-specific B cells<sup>b</sup></b>     | 12 | -0.336                          | 0.2845               | 0.6748                        |        |

<sup>a</sup> or <sup>b</sup> FDR adjustment for multiple comparisons for the sets of tests specified by the subscript

<sup>a</sup> or <sup>b</sup> as described in Materials and Methods

<sup>c</sup> exact p-value to test whether the correlation appears to be significantly different from 0

**Table 2: FACS reagent information**

| <b>Panel/<br/>Marker</b>            | <b>Type</b>   | <b>Fluorochrome</b> | <b>Clone</b> | <b>Vendor</b>  |
|-------------------------------------|---------------|---------------------|--------------|----------------|
| <b>Activation</b>                   |               |                     |              |                |
| Viability Dye                       | surface       | aqua                | N/A          | Invitrogen     |
| CD3                                 | surface       | BV421               | SP34-2       | BD Biosciences |
| CD4                                 | surface       | PerCP-Cy5.5         | L200         | BD Biosciences |
| CD8                                 | surface       | Alexa Fluor 700     | RPA-T8       | BD Biosciences |
| CD14                                | surface       | BV786               | M5E2         | BD Biosciences |
| CD16                                | surface       | PE-CF594            | 3G8          | BD Biosciences |
| CD20                                | surface       | APC-H7              | 2H7          | BD Biosciences |
| CD69                                | surface       | PE-Cy7              | FN50         | BD Biosciences |
| CD195                               | surface       | PE                  | 3A9          | BD Biosciences |
| HLA-DR                              | surface       | BV711               | G46-6        | BD Biosciences |
| PD-1                                | surface       | APC                 | eBioJ105     | eBioscience    |
| Ki-67                               | intracellular | FITC                | B56          | BD Biosciences |
| TNF- $\alpha$                       | intracellular | BV650               | Mab11        | BD Biosciences |
| <b>Antigen-specific<br/>T cells</b> |               |                     |              |                |
| Viability Dye                       | surface       | aqua                | N/A          | Invitrogen     |
| CD3                                 | surface       | APC-Cy7             | SP34-2       | BD Biosciences |
| CD4                                 | surface       | PE-CF594            | L200         | BD Biosciences |
| CD8                                 | surface       | BV786               | RPA-T8       | BD Biosciences |
| CD45RA                              | surface       | V450                | 5H9          | BD Biosciences |
| CCR7                                | surface       | PE-Cy7              | 3D12         | BD Biosciences |
| IL-2                                | intracellular | PerCP-Cy5.5         | MQ1-17H12    | BD Biosciences |
| IL-17                               | intracellular | PE                  | eBio64CAP17  | BD Biosciences |
| IFN- $\gamma$                       | intracellular | Alexa Fluor 700     | B27          | BD Biosciences |
| TNF- $\alpha$                       | intracellular | APC                 | Mab11        | BD Biosciences |

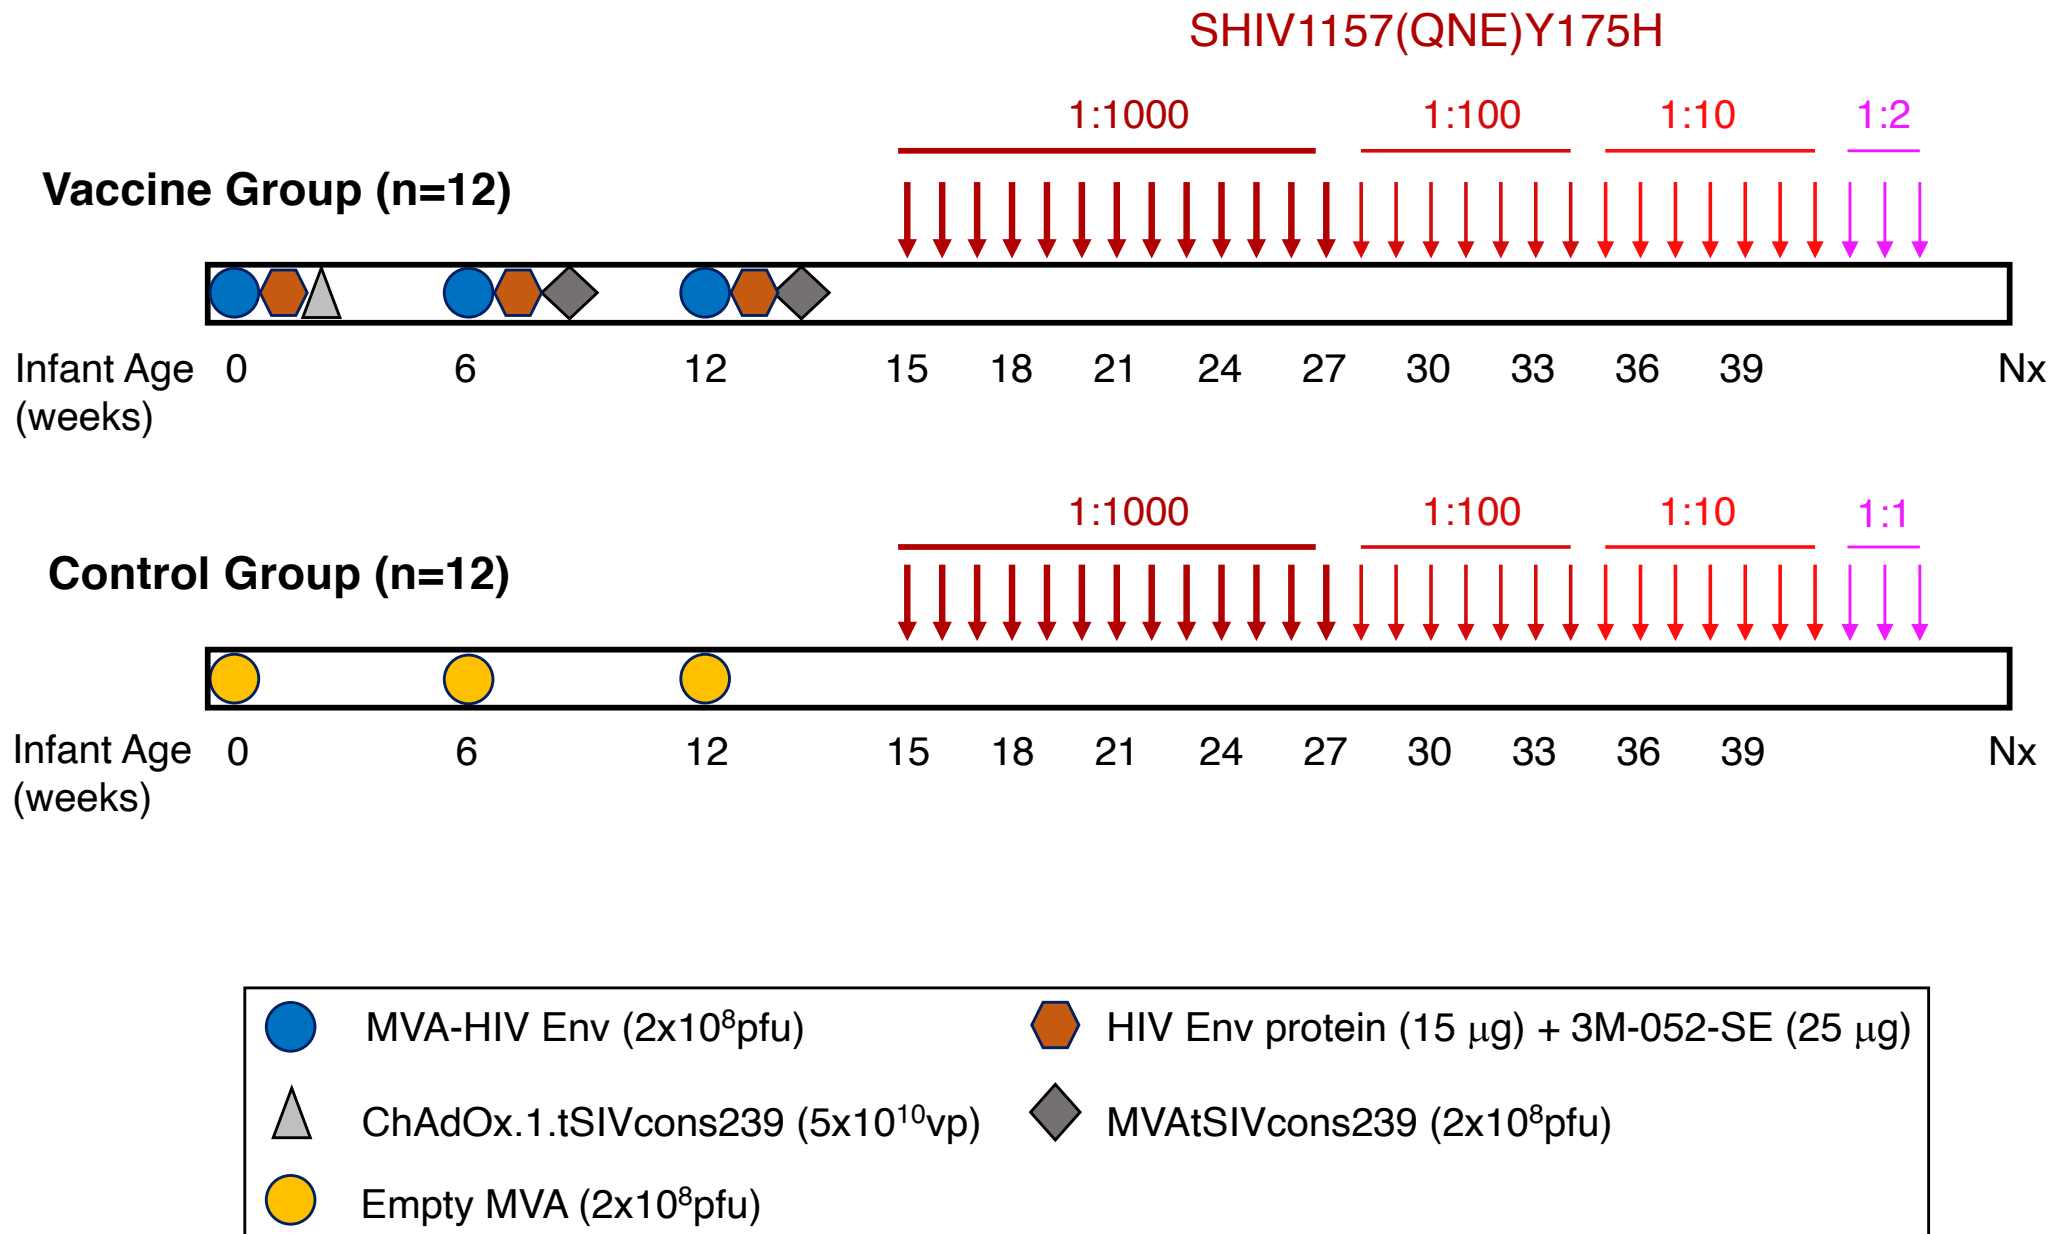

**Figure 1 Curtis et al.**



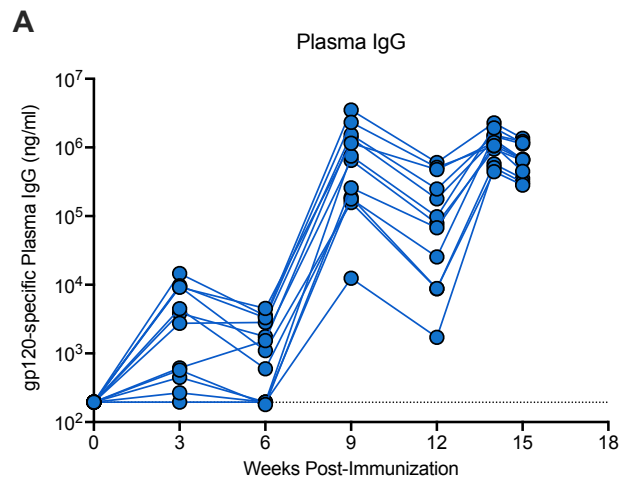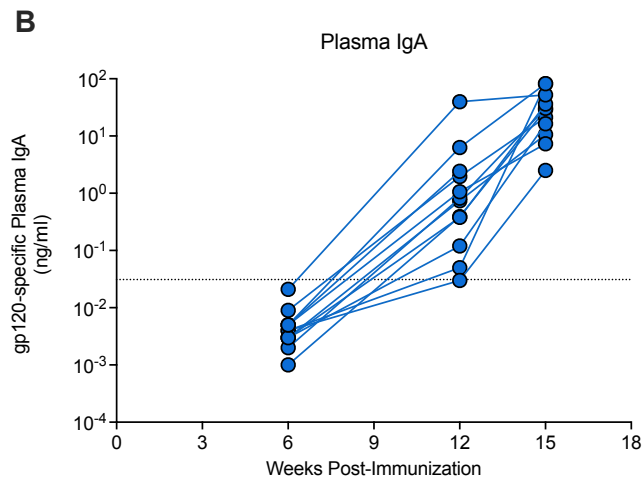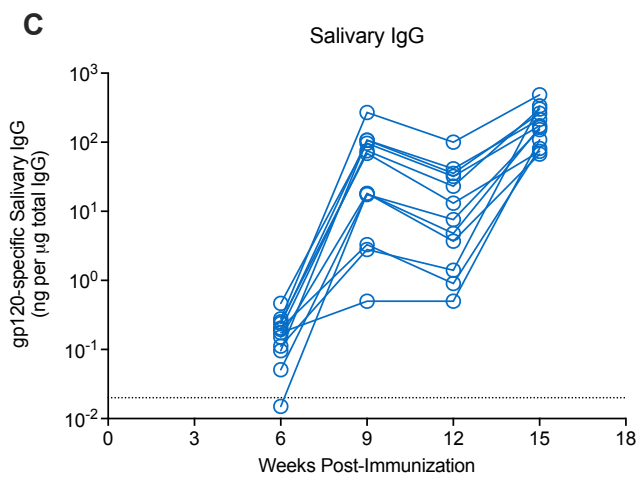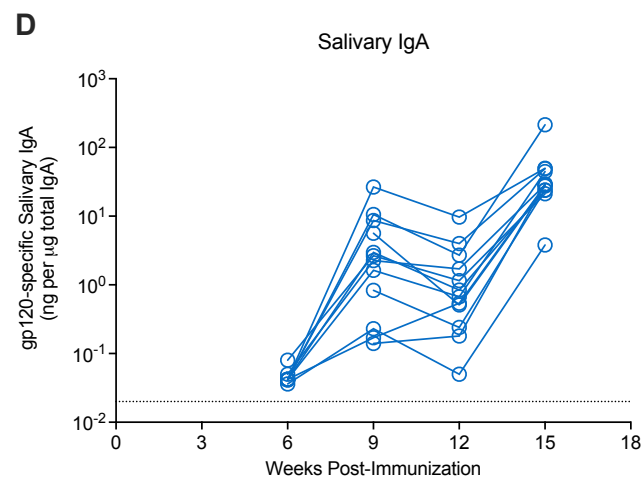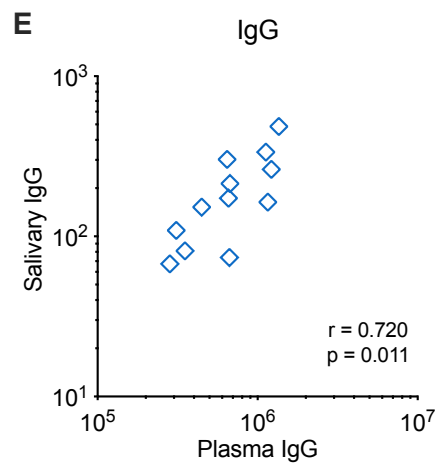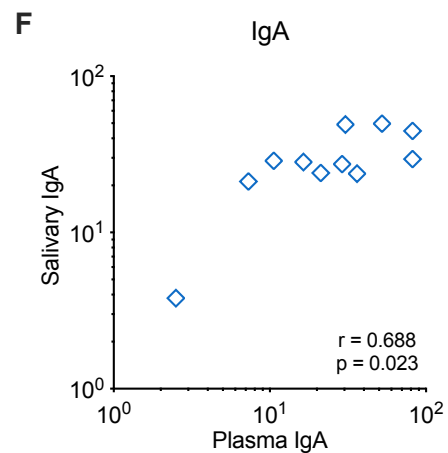

Figure 2 Curtis et al.

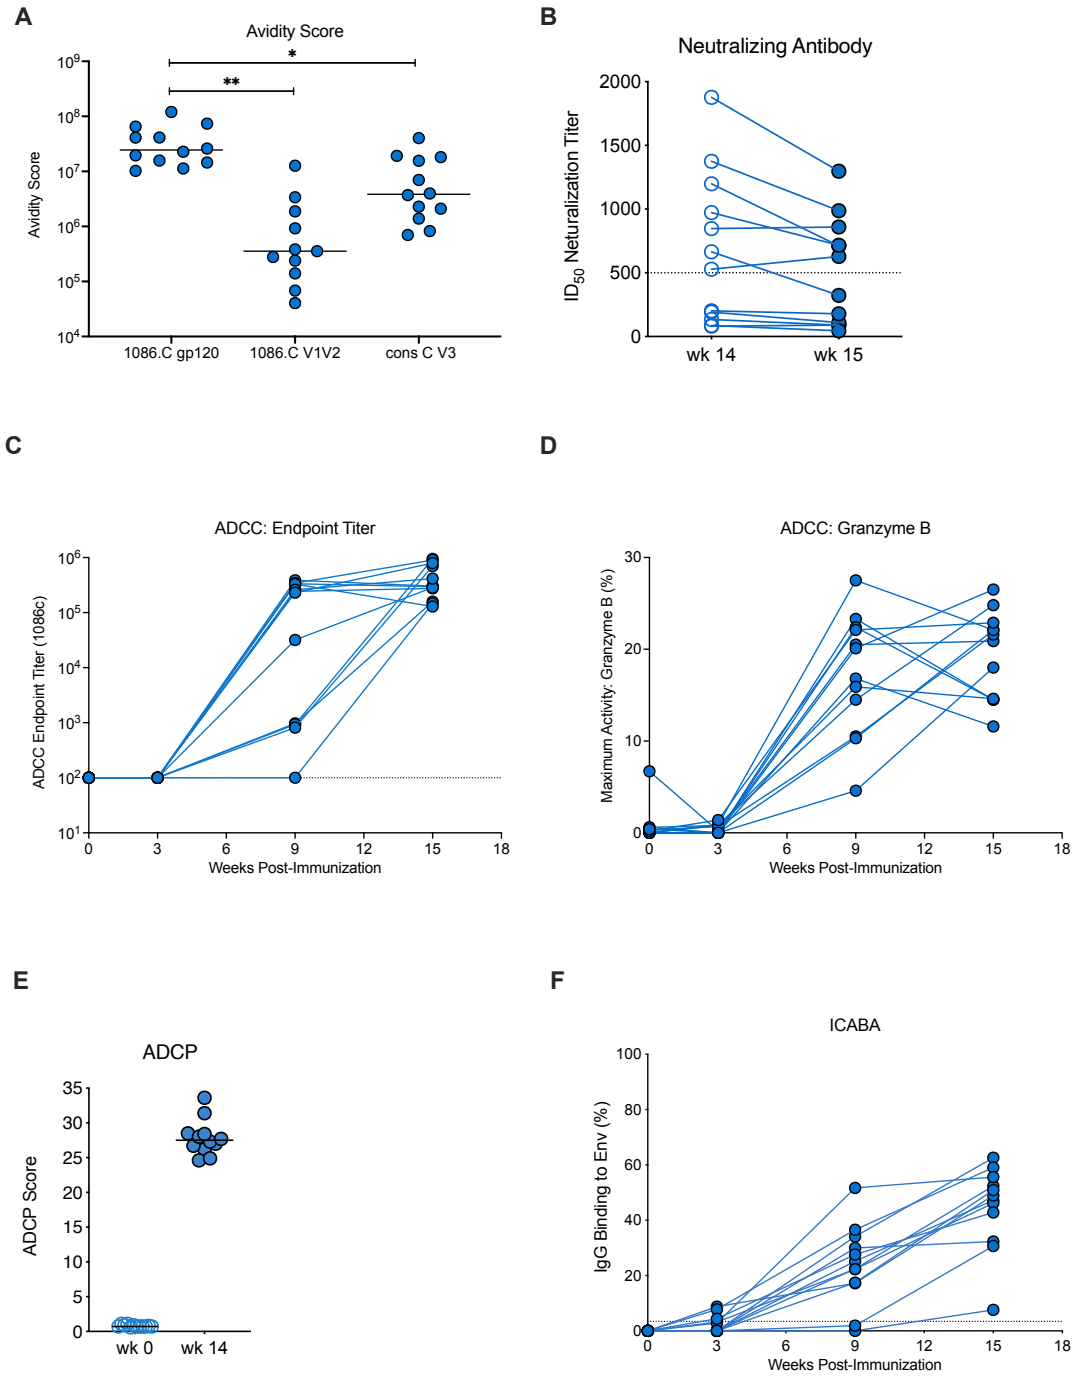

**Figure 3**  
Curtis et al.

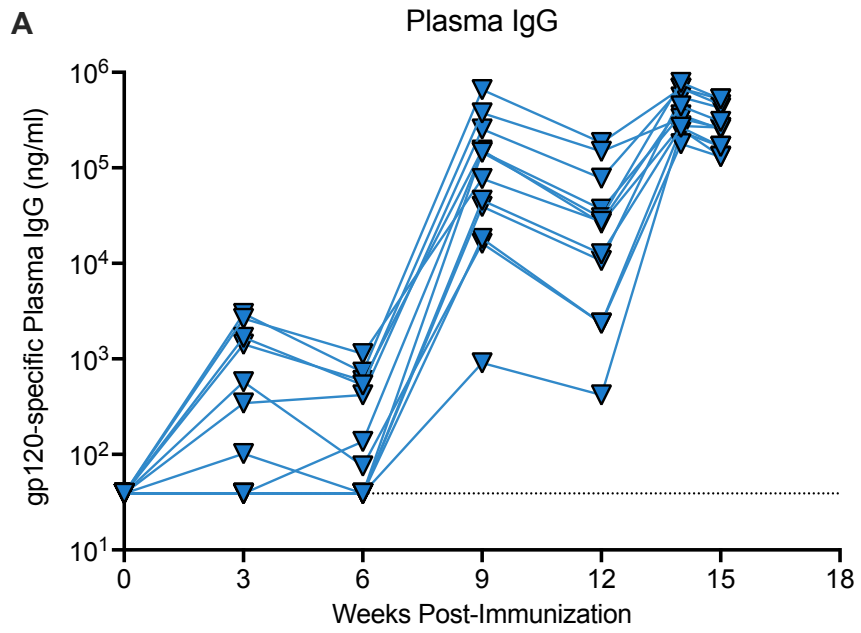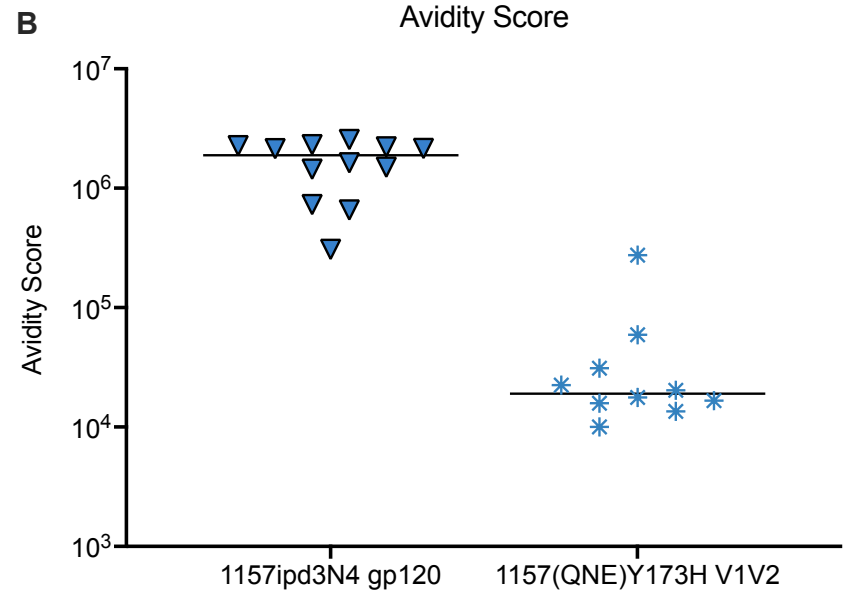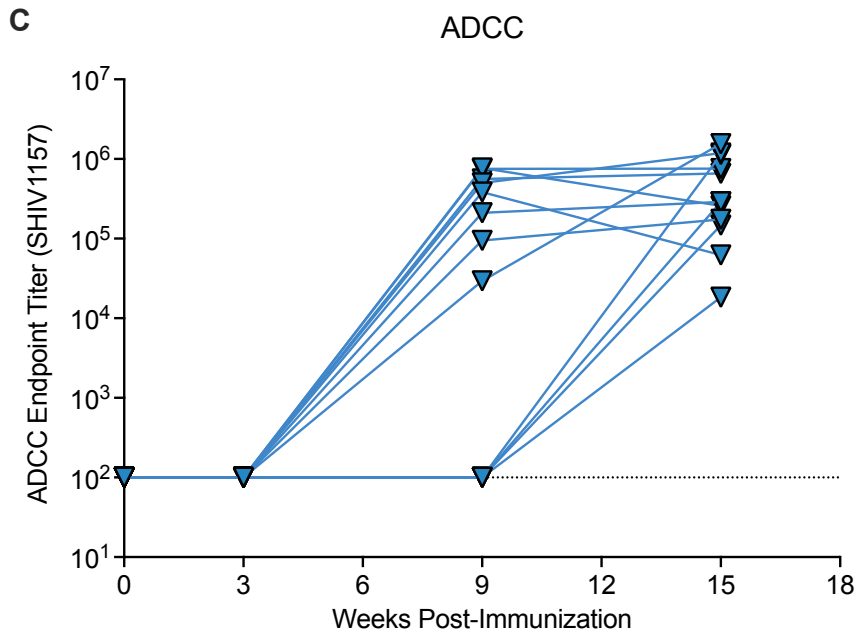

Figure 4 Curtis et al.

### A: PBMC

### CD4<sup>+</sup> T Cells

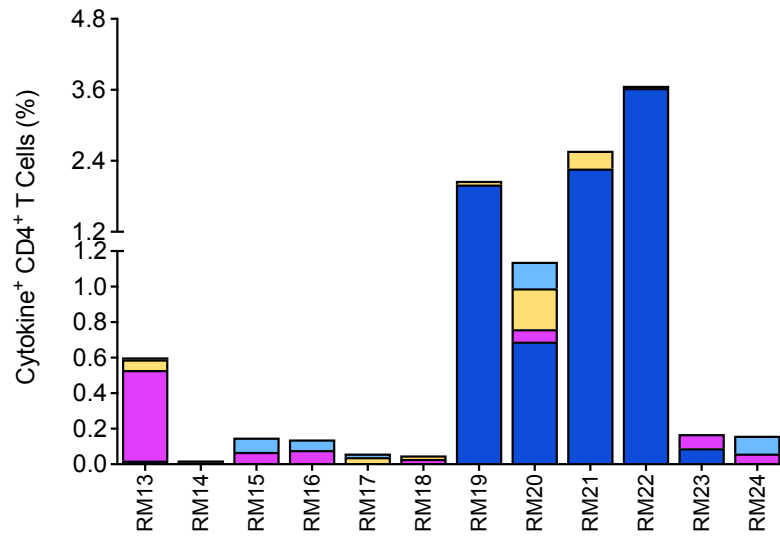

### CD8<sup>+</sup> T Cells

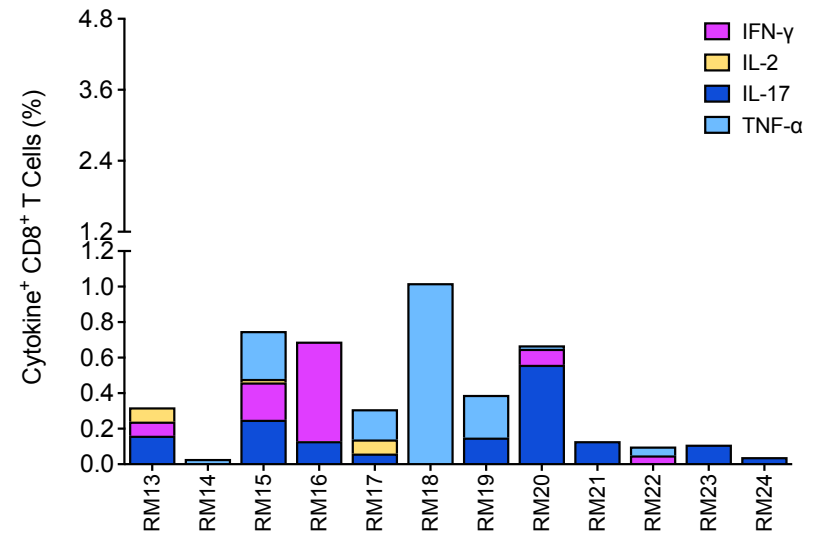

### B: Lymph Nodes

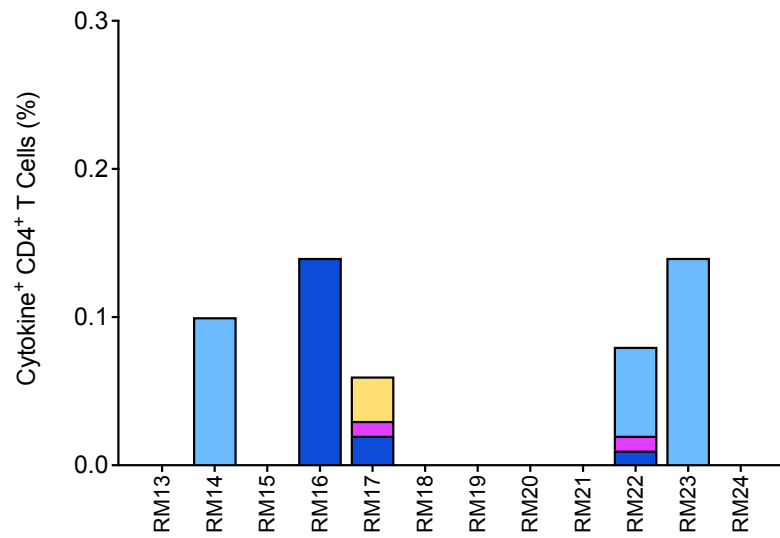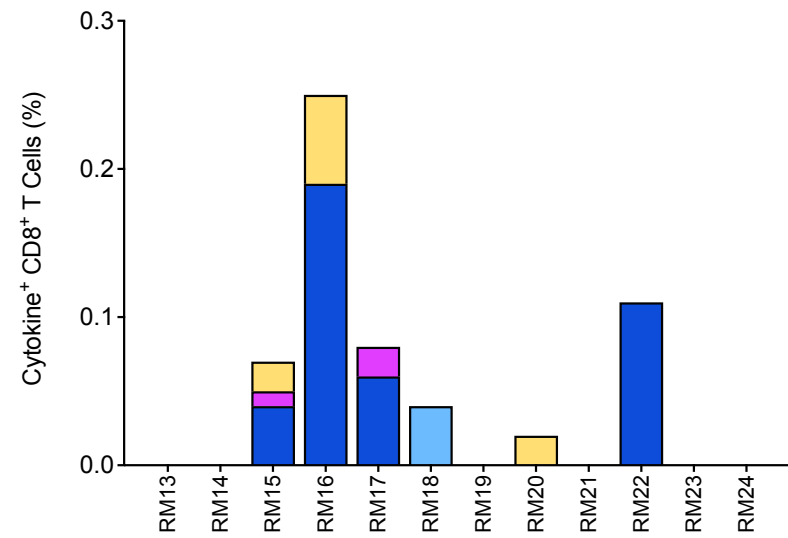

**Figure 5**  
**Curtis et al.**

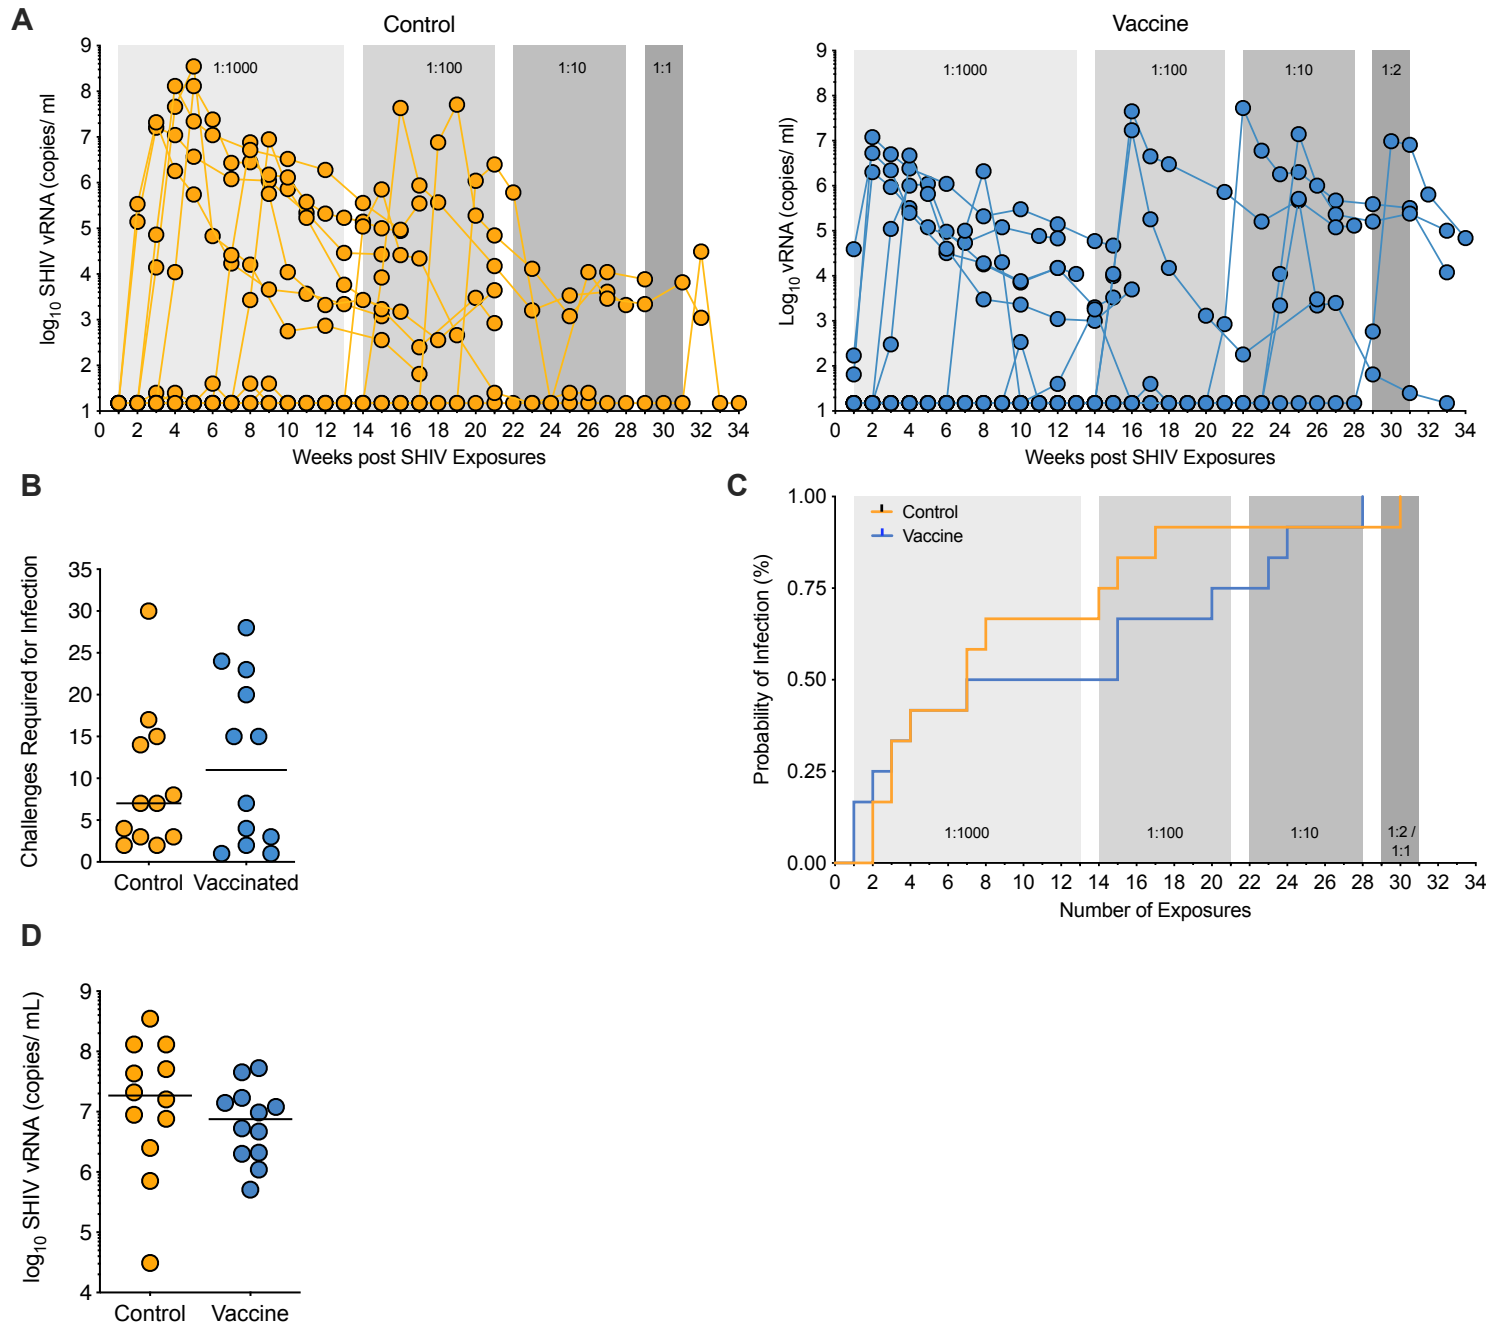

**Figure 6**  
Curtis et al.

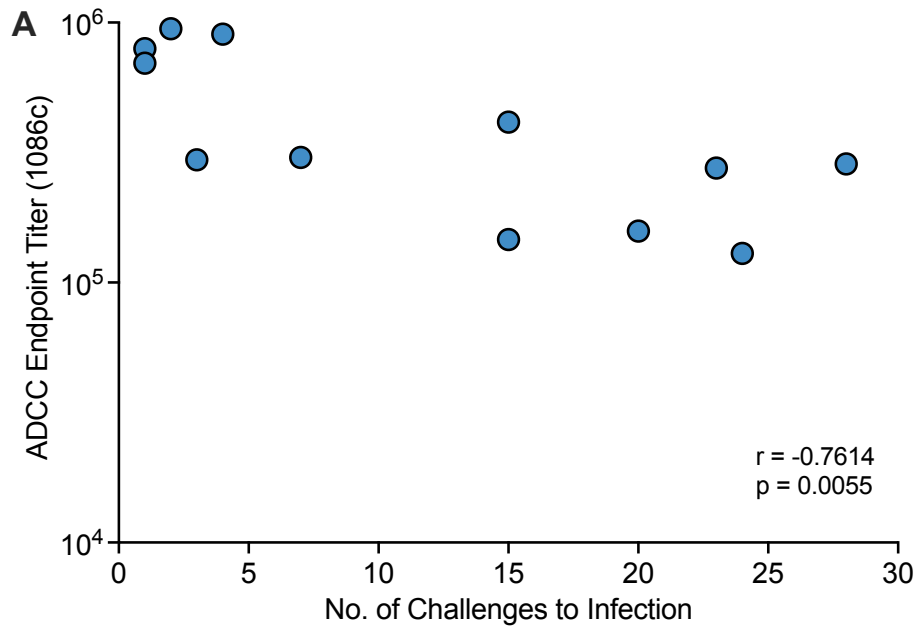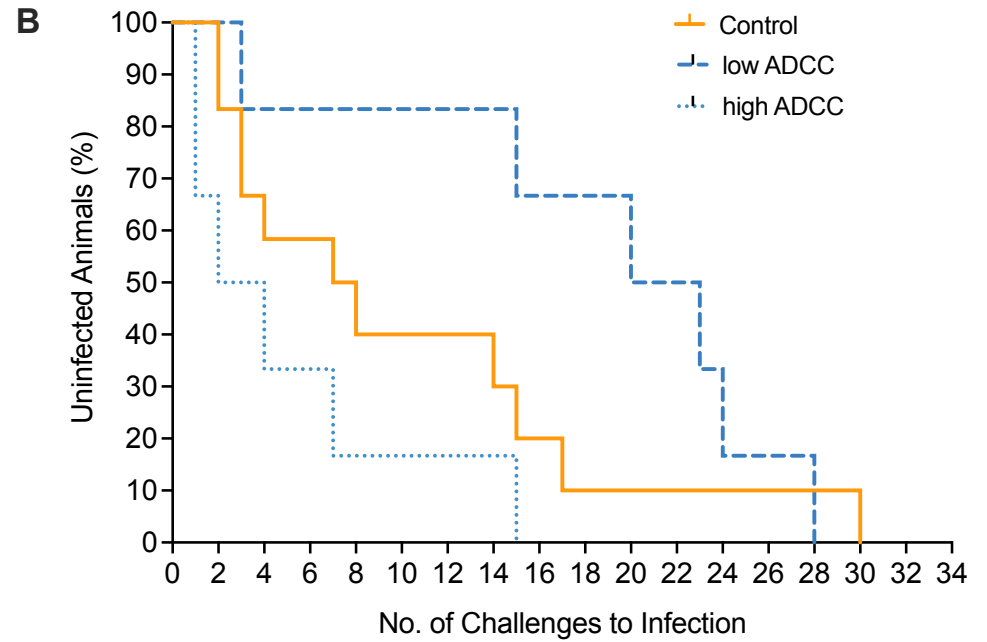

**Figure 7**  
**Curtis et al.**

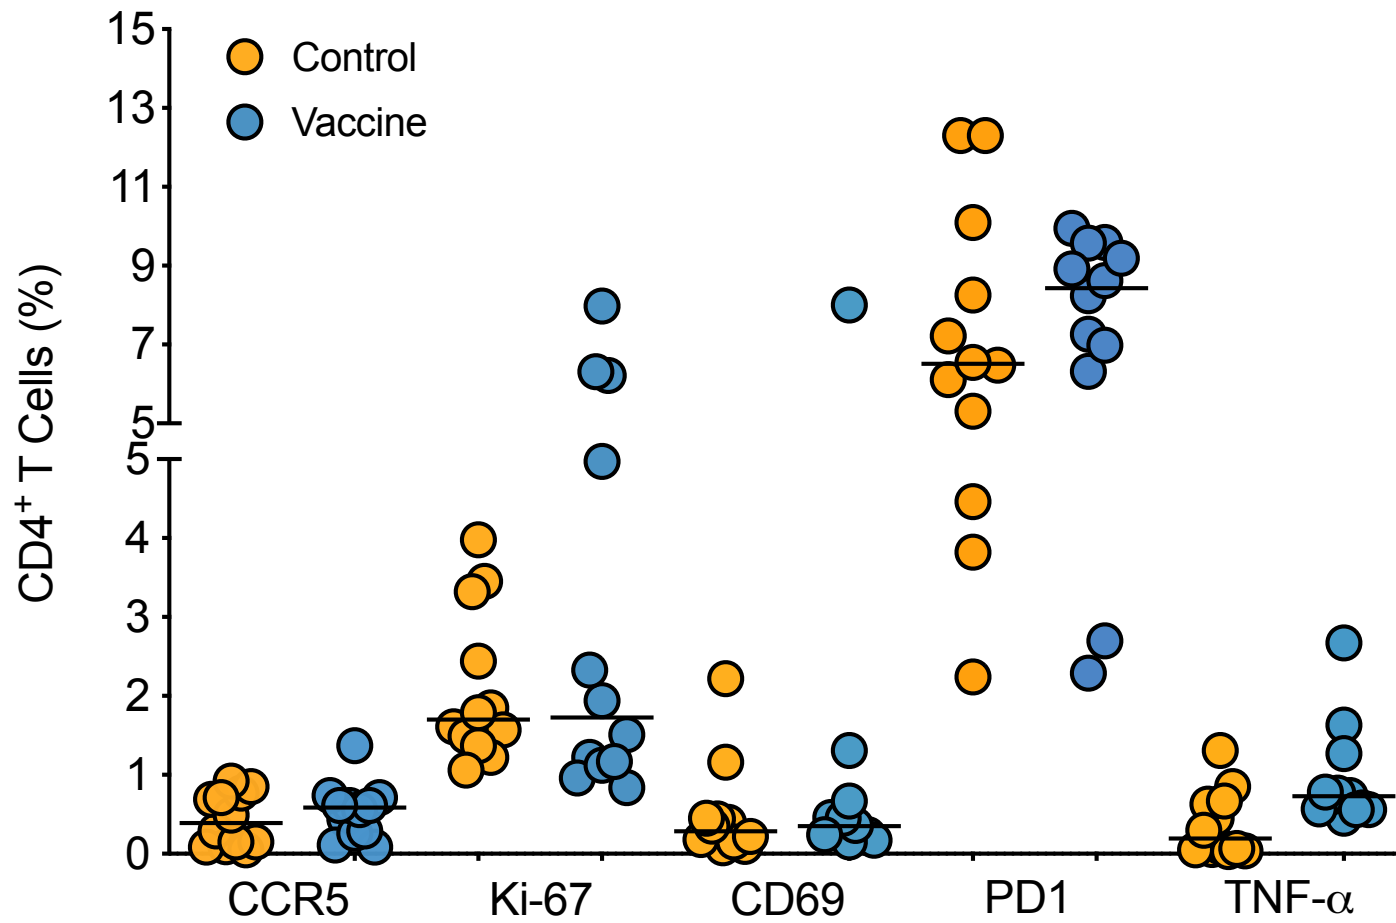

**Figure 8**  
Curtis et al.
